# Supplementary material for: Bangladesh Environmental Enteric Dysfunction (BEED) study: protocol for a community-based intervention study to validate non-invasive biomarkers of environmental enteric dysfunction
Source: PubMed Central journal article supplement (PMC5724211; doi:10.1136/bmjopen-2017-017768), 2017-08-11
Supplement: bmjopen-2017-017768.draft_revisions.pdf [file bmjopen-2017-017768.draft_revisions.pdf]

# BMJ Open

BMJ Open is committed to open peer review. As part of this commitment we make the peer review history of every article we publish publicly available.

When an article is published we post the peer reviewers' comments and the authors' responses online. We also post the versions of the paper that were used during peer review. These are the versions that the peer review comments apply to.

The versions of the paper that follow are the versions that were submitted during the peer review process. They are not the versions of record or the final published versions. They should not be cited or distributed as the published version of this manuscript.

BMJ Open is an open access journal and the full, final, typeset and author-corrected version of record of the manuscript is available on our site with no access controls, subscription charges or pay-per-view fees (<http://bmjopen.bmj.com>).

If you have any questions on BMJ Open's open peer review process please email [editorial.bmjopen@bmj.com](mailto:editorial.bmjopen@bmj.com)

# BMJ Open

## Systematic Review of preoperative physical activity and its impact on post-cardiac surgical outcomes

|                                 |                                                                                                                                                                                                                                                                                                                                                                                                                                                                                   |
|---------------------------------|-----------------------------------------------------------------------------------------------------------------------------------------------------------------------------------------------------------------------------------------------------------------------------------------------------------------------------------------------------------------------------------------------------------------------------------------------------------------------------------|
| Journal:                        | <i>BMJ Open</i>                                                                                                                                                                                                                                                                                                                                                                                                                                                                   |
| Manuscript ID                   | bmjopen-2016-015712                                                                                                                                                                                                                                                                                                                                                                                                                                                               |
| Article Type:                   | Research                                                                                                                                                                                                                                                                                                                                                                                                                                                                          |
| Date Submitted by the Author:   | 22-Dec-2016                                                                                                                                                                                                                                                                                                                                                                                                                                                                       |
| Complete List of Authors:       | Kehler, D. Scott<br>Stammers, Andrew N.; University of Manitoba,<br>Tangri, Navdeep; University of Manitoba, Medicine<br>Hiebert, Brett<br>Fransoo, Randy; University of Manitoba, Community Health Sciences<br>Schultz, Annette; University of Manitoba, Nursing<br>Macdonald, Kerry<br>Giacomontonio, Nicholas<br>Hassan, Ansar; New Brunswick Heart Centre,<br>Légaré, Jean-Francois<br>Arora, Rakesh C.; University of Manitoba,<br>Duhamel, Todd A.; University of Manitoba, |
| <b>Primary Subject Heading</b>: | Cardiovascular medicine                                                                                                                                                                                                                                                                                                                                                                                                                                                           |
| Secondary Subject Heading:      | Rehabilitation medicine                                                                                                                                                                                                                                                                                                                                                                                                                                                           |
| Keywords:                       | Cardiac surgery < SURGERY, REHABILITATION MEDICINE, Exercise, Postoperative complications, Prognosis                                                                                                                                                                                                                                                                                                                                                                              |
|                                 |                                                                                                                                                                                                                                                                                                                                                                                                                                                                                   |

SCHOLARONE™  
Manuscripts

**Running Head:** PA and post-cardiac surgical outcomes

**Title: Systematic Review of preoperative physical activity and its impact on post-cardiac surgical outcomes**

**Authors**

D. Scott Kehler, MSc,<sup>§1,2</sup> Andrew N. Stammers, B. Kin,<sup>1,2</sup> Navdeep Tangri, PhD,<sup>3</sup> Brett Hiebert, MSc,<sup>4</sup> Randy Fransoo, PhD,<sup>5</sup> Annette S. Schultz, RN, PhD,<sup>6</sup> Kerry Macdonald, MLIS,<sup>7</sup> Nicholas Giacomantonio, MD, FRCPC,<sup>8</sup> Ansar Hassan, MD, PhD, FRCSC,<sup>9</sup> Jean-Francois Légaré, MD, FRCSC,<sup>10</sup> Rakesh C. Arora, MD, PhD, FRCSC, FACS,<sup>†4</sup> and Todd A. Duhamel, PhD.<sup>†1,2</sup>

<sup>†</sup>Contributed equally as senior authors

<sup>§</sup>Corresponding author

**Affiliations**

<sup>1</sup>Health, Leisure & Human Performance Research Institute, Faculty of Kinesiology and Recreation Management, University of Manitoba, Winnipeg, Canada;

<sup>2</sup>Institute of Cardiovascular Sciences, St. Boniface Hospital Research Centre, Winnipeg, Canada;

<sup>3</sup>Seven Oaks Hospital Research Centre, Winnipeg, Canada;

<sup>4</sup>Department of Surgery, University of Manitoba and Cardiac Sciences Program, Winnipeg, Canada;

<sup>5</sup>Department of Community Health Sciences and Manitoba Centre for Health Policy, University of Manitoba, Winnipeg, Canada;

<sup>6</sup>College of Nursing, Faculty of Health Sciences, University of Manitoba Winnipeg, Canada;

<sup>7</sup>Seven Oaks Hospital Library, Winnipeg, Canada;

<sup>8</sup>Division of Cardiology, Department of Medicine, Dalhousie University, Halifax, Canada;

<sup>9</sup>Department of Cardiac Surgery, New Brunswick Heart Centre, Saint John Regional Hospital, Saint John, Canada;

<sup>10</sup>Division of Cardiac Surgery, Department of Surgery, Dalhousie University, Halifax, Canada;

**Running Head:** PA and post-cardiac surgical outcomes

2

1  
2  
3  
4  
5  
6  
7  
8  
9  
10  
11  
12  
13  
14  
15  
16  
17  
18  
19  
20  
21  
22  
23  
24  
25  
26  
27  
28  
29  
30  
31  
32  
33  
34  
35  
36  
37  
38  
39  
40  
41  
42  
43  
44  
45  
46  
47  
48  
49  
50  
51  
52  
53  
54  
55  
56  
57  
58  
59  
60

**Address for correspondence:**

1. Mr. Scott Kehler, 212 Active Living Centre, Winnipeg, MB, Canada, R3T 2N2

Telephone +1204 918 9131 Fax +1204 474 7634

e-mail: [skehler@sbrc.ca](mailto:skehler@sbrc.ca)

**Acknowledgements:**

Dr. Francesco Cacciatore and his research group provided additional data on ICU length of stay. TAD was supported by a Manitoba Health Research Council (MHRC) Establishment Grant. DSK was supported by an MHRC Studentship, A CIHR Frederick Banting and Charles Best Canada Graduate Scholarship, a CIHR Strategic Training Initiative in Health Research (STIHR) Knowledge Translation Canada Student Fellowship, a CIHR STIHR Population Intervention for Chronic Disease Prevention Fellowship and the Heart and Stroke Foundation Dr. Dexter Harvey Award. ANS was supported by a CIHR Canada Graduate Scholarship.

**Authors' Contributions:**

DSK was responsible for 1) analysis and interpretation of data, 2) drafting and revising the manuscript, and 3) consenting for manuscript submission. ANS, BH, NT, RF, ASH, NG, AH, JL were responsible for 1) analysis and interpretation of data, 2) revising the manuscript, and 3) consenting for manuscript submission. KM was responsible for 1) developing the systematic review literature search, 2) analysis and interpretation of data, 3) drafting and revising the manuscript, and 3) consenting for manuscript submission. RCA and TAD were responsible for 1) the conception and design, and analysis and interpretation of data, 2) revising the manuscript, and 3) consenting for manuscript submission RCA and TAD are co-senior authors.

**Funding:**

The work was supported by an Operating Grant from the Canadian Institutes of Health Research

**Running Head:** PA and post-cardiac surgical outcomes

53 grant number 326290.

54

55 **Ethics Approval:**

56 Not applicable

57

58 **Systematic review registration number:**

59 PROSPERO: CRD42015023606

60

61 **Competing Interests:**

62 The authors have no conflicts of interest to declare

63

64 Word count (not including abstract, tables, and references): 2956

65 Figures and tables: 5

**Running Head:** PA and post-cardiac surgical outcomes

4

1  
2  
3  
4  
5  
6  
7  
8  
9  
10  
11  
12  
13  
14  
15  
16  
17  
18  
19  
20  
21  
22  
23  
24  
25  
26  
27  
28  
29  
30  
31  
32  
33  
34  
35  
36  
37  
38  
39  
40  
41  
42  
43  
44  
45  
46  
47  
48  
49  
50  
51  
52  
53  
54  
55  
56  
57  
58  
59  
60

66 **ABSTRACT:**

67 **Objectives:** The objective of this systematic review was to study the impact of preoperative physical  
68 activity levels adult cardiac surgical patients' postoperative: 1) major adverse cardiac and cerebrovascular  
69 events (MACCE), 2) adverse events within 30 days, 3) hospital length of stay (HLOS), 4) intensive care  
70 unit length of stay (ICU LOS), 5) activities of daily living (ADLs), 6) quality of life, 7) cardiac  
71 rehabilitation attendance, and 8) physical activity behavior.

72 **Methods:** A systematic search of MEDLINE, Embase, AgeLine, and Cochrane library for cohort studies  
73 was conducted.

74 **Results:** Eleven studies (n=5,733 patients) met the inclusion criteria. Only self-reported physical activity  
75 tools were used. Few studies used multivariate analyses to compare active versus inactive patients prior to  
76 surgery. When comparing patients who were active versus inactive preoperatively, there were mixed  
77 findings for MACCE, 30 day adverse events, HLOS, and ICU LOS. Of the studies which adjusted for  
78 confounding variables, five studies found a protective, independent association between physical activity  
79 and MACCE (n= 1), 30 day postoperative events (n= 2), hospital length of stay (n= 1), and ICU length of  
80 stay (n= 1), but two studies found no protective association for 30 day postoperative events (n= 1) and  
81 postoperative ADLs (n= 1). No studies investigated if activity status before surgery impacted quality of  
82 life or cardiac rehabilitation attendance postoperatively. Three studies found that active patients prior to  
83 surgery were more likely to be inactive postoperatively.

84 **Conclusion:** Due to the mixed findings, the literature does not presently support that self-reported  
85 preoperative physical activity behavior is associated with postoperative cardiac-surgical outcomes. Future  
86 studies should objectively measure physical activity, clearly define outcomes, and adjust for clinically  
87 relevant variables.

88 **Registration:** PROSPERO number CRD42015023606.

89  
90 **Keywords:** Cardiac Surgical Procedures, Exercise, Prognosis, Postoperative Complications

**Running Head:** PA and post-cardiac surgical outcomes

1  
2  
3 92 **ARTICLE SUMMARY**  
4

5 93 **Strengths and limitations of this study**  
6

- 7 94 - There were mixed findings regarding the impact of physical activity on post cardiac-surgical  
8 outcomes.  
9  
10 95  
11  
12 96 - Only self-reported physical activity tools were used.  
13  
14 97 - The multiple tools to measure physical activity and the variety of definitions of outcomes did not  
15  
16 98 allow for a quantitative synthesis (meta-analysis).  
17  
18  
19  
20  
21  
22  
23  
24  
25  
26  
27  
28  
29  
30  
31  
32  
33  
34  
35  
36  
37  
38  
39  
40  
41  
42  
43  
44  
45  
46  
47  
48  
49  
50  
51  
52  
53  
54  
55  
56  
57  
58  
59  
60

## 99 INTRODUCTION

100 Recent reports suggest that more than half of cardiac surgeries are being performed on older adults who  
101 are more likely to be frail and have multiple co-morbidities.<sup>1</sup> While cardiac surgery has been shown to  
102 improve the outcomes of these patients, more than 75% of major perioperative complications and deaths  
103 occur in older adults.<sup>2,3</sup> Before surgery, many of these patients are de-conditioned and have diminished  
104 resilience in the face of major stressors such as cardiac surgery, and it has been postulated that they could  
105 benefit from a therapeutic intervention prior to their major surgical procedure in order to reduce their  
106 operative risk. However, little information exists to evaluate the benefit of preoperative risk reduction  
107 strategies for the older cardiac surgery patient.

109 Adopting and sustaining a more physically active lifestyle is typically intended to be a part of an  
110 interdisciplinary rehabilitation plan that is instituted postoperatively and has been shown to reduce the  
111 risk of cardiac mortality and hospital admissions and improve health-related (QOL) in patients.<sup>4</sup>  
112 Importantly, older adults who sustain a physically active lifestyle after a postoperatively exercise-based  
113 rehabilitation program can continue to improve their functional walking status.<sup>5</sup> However, evidence  
114 suggests that cardiac surgery patients are highly sedentary during the preoperative period, especially in  
115 older adults.<sup>6</sup> Furthermore, few randomized controlled trials exist which evaluate the therapeutic benefit  
116 of preoperative lifestyle modification in patients undergoing cardiac surgery.<sup>7-9</sup> Information regarding the  
117 link between preoperative physical activity and postoperative health outcomes in cardiac surgery patients  
118 would be valuable for healthcare providers to assist them in selecting patients who might benefit from  
119 preoperative exercise therapy.

121 The purpose of this systematic review was to compare the following postoperative outcomes between  
122 cardiac surgery patients defined as physically active prior to surgery and those who were defined as  
123 physically inactive preoperatively: 1) major adverse cerebrovascular and cardiovascular events (MACCE)  
124 2) 30-day adverse events 3) hospital length of stay, 4) Intensive Care Unit (ICU) length of stay, 5) health-



**Running Head:** PA and post-cardiac surgical outcomes

1  
2  
3 125 related QOL, 6) activities of daily living (ADL) 7) cardiac rehabilitation attendance and 8) physical  
4  
5 126 activity levels postoperatively.  
6  
7  
8 127  
9  
10  
11  
12  
13  
14  
15  
16  
17  
18  
19  
20  
21  
22  
23  
24  
25  
26  
27  
28  
29  
30  
31  
32  
33  
34  
35  
36  
37  
38  
39  
40  
41  
42  
43  
44  
45  
46  
47  
48  
49  
50  
51  
52  
53  
54  
55  
56  
57  
58  
59  
60

For peer review only

Running Head: PA and post-cardiac surgical outcomes

8

1  
2  
3 128 **MATERIAL AND METHODS**  
4

5 129

6  
7  
8 130 The protocol for this systematic review has been described in PROSPERO: CRD42015023606. Note  
9  
10 131 the following *ad-hoc* changes to the previous protocol: ICU length of stay and postoperative physical  
11  
12 132 activity as additional outcomes were explored in this systematic review.  
13

14 133

15  
16 134 **Eligibility criteria**  
17

18 135

19  
20 136 Eligible studies included cohort studies which examined adult (>18 years) cardiac surgery patients  
21  
22 137 undergoing coronary artery bypass grafting (CABG), aortic or mitral valve repair/replacement,  
23  
24 138 transcatheter aortic valve implantation, or combined procedures. Studies with patients undergoing  
25  
26 139 congenital cardiac surgery, heart transplantation or left ventricular assist device implantation procedures  
27  
28 140 were excluded. Studies could compare physically active versus inactive patients prior to cardiac surgery  
29  
30 141 on the basis of subjective (e.g., questionnaire) or objective (e.g., pedometer, accelerometry) assessments  
31  
32 142 of physical activity.  
33  
34 143

35 144

36  
37  
38 145 Eligible studies had to compare at least one of the following postoperative outcomes: MACCE defined  
39  
40 146 as death, stroke, myocardial infarction, and the need for emergency cardiac surgery; 30-day adverse  
41  
42 147 events as defined by the Society of Thoracic Surgeons (STS);<sup>10</sup> Hospital length of stay; ICU length of  
43  
44 148 stay; health-related QOL with any assessment tool; ADLs using any evaluation strategy; cardiac  
45  
46 149 rehabilitation attendance; and physical activity behavior using either subjective or objective forms of  
47  
48  
49  
50

51 150

52  
53 151

54  
55 152

56  
57 153  
58  
59  
60

**Running Head:** PA and post-cardiac surgical outcomes

1  
2  
3 154 **Search strategy**  
4

5 155  
6  
7 156 The search strategy was completed by a librarian and reviewed by a second librarian. The search  
8  
9  
10 157 included keywords and controlled vocabulary. English language limits were applied. Databases used  
11  
12 158 included MEDLINE, Embase, AgeLine, and Cochrane Library (CDSR, CENTRAL, DARE). The  
13  
14 159 MEDLINE strategy was registered and published online in PROSPERO  
15  
16 160 ([http://www.crd.york.ac.uk/PROSPEROFILES/23606\\_STRATEGY\\_20150518.pdf](http://www.crd.york.ac.uk/PROSPEROFILES/23606_STRATEGY_20150518.pdf)). The search was  
17  
18 161 validated through a cross-check of references of studies selected for inclusion. In addition, conference  
19  
20 162 abstracts were hand searched using the Internet. Attempts were made to contact authors of conference  
21  
22 163 abstracts to determine if their findings were published in a peer-reviewed journal.  
23  
24  
25 164  
26  
27 165  
28

29 166 **Study selection**  
30  
31 167

32  
33 168 The title, abstract and full-text article screening processes were independently completed by two  
34  
35 169 reviewers. A training exercise for the title and abstract phase was conducted by the independent reviewers  
36  
37 170 using a random sample of 100 titles and abstracts. Discrepancies in studies for inclusion were resolved by  
38  
39 171 discussion of the two reviewers. The final observed agreement was 98% with a kappa statistic of 0.47 for  
40  
41 172 the title and abstract screen. One training exercise of 10 randomly selected articles was completed for the  
42  
43 173 full-text screen. Discrepancies for inclusion were resolved through discussion. The observed agreement  
44  
45 174 for the full-text screen was 96% with a kappa statistic of 0.83.  
46  
47  
48 175

49  
50  
51 176 **Data abstraction**  
52  
53 177

54  
55 178 Two reviewers independently extracted relevant data for the selected outcomes described above.  
56  
57 179 Discrepancies in the data extraction procedure were resolved through discussion. Data abstraction items  
58  
59  
60

**Running Head:** PA and post-cardiac surgical outcomes

10

1  
2  
3 180 included study characteristics (e.g., authors, year of publication, sample size, follow up time points if  
4  
5 181 relevant), patient characteristics (e.g., age, sex, surgery type), physical activity tool used, and the  
6  
7 182 outcomes which were measured.  
8  
9

10 183

### 11 184 **Risk of bias assessment**

13 185

16 186 Two reviewers independently reviewed the risk of bias of each included study using the Newcastle-  
17  
18 187 Ottawa Scale.<sup>11</sup> Items within this tool assess the risk of bias associated with selection of participants,  
19  
20 188 comparability (e.g., study authors controlled for patient demographics and clinical characteristics), and  
21  
22 189 outcome assessment (e.g., data collection method for outcome, sufficient follow-up, and adequacy of  
23  
24 190 follow up of cohorts). Each study was given a score within each category (Selection: 0-4; Comparability:  
25  
26 191 0-2; and Outcome: 0-3) and an overall score ranging from 0-9. A score of zero suggests an increased risk  
27  
28 192 of bias and a higher score suggests a lower risk of bias.  
29  
30

31 193

### 33 194 **Quantitative synthesis**

35 195

37 196 Due to the significant heterogeneity between studies in terms of physical activity assessment tools used  
38  
39  
40 197 and outcomes assessed, meta-analyses were not performed.  
41  
42  
43  
44  
45  
46  
47  
48  
49  
50  
51  
52  
53  
54  
55  
56  
57  
58  
59  
60

**Running Head:** PA and post-cardiac surgical outcomes

1  
2  
3 198 **RESULTS**  
4

5 199  
6  
7  
8 200 The literature search results are shown in Figure 1. After removing duplicates, 5722 articles were title  
9  
10 201 and abstract screened. A total of 137 articles were then assessed in full-text. Eleven studies met the  
11  
12 202 eligibility criteria for the final analysis, and they included a total of 5,733 patients.<sup>12-22</sup>  
13

14 203  
15  
16 204 An overview of the included studies can be viewed in Table 1. Five studies evaluated CABG only  
17  
18 205 patients,<sup>12-16</sup> four evaluated both CABG and/or valve procedures,<sup>17-21</sup> and one study evaluated isolated  
19  
20 206 aortic valve repair patients.<sup>22</sup> The average age of participants in different studies ranged from 60 years<sup>15,16</sup>  
21  
22 207 to 75 years.<sup>17,18,21,22</sup> Six studies excluded patients with physical impairments or with New York Heart  
23  
24 208 Association heart failure class IV symptoms (severe cardiac symptoms)<sup>14-19</sup> but in general exclusion  
25  
26 209 criteria were not explicitly reported. Studies were conducted in the Netherlands,<sup>12,14,20,22</sup> Brazil,<sup>13,15,16</sup>  
27  
28 210 Italy,<sup>17-19</sup> and the United States.<sup>21</sup> Two studies used the same patient sample, but examined different  
29  
30 211 outcomes.<sup>15,16</sup> The sample size of studies ranged from 35<sup>21</sup> to 3150.<sup>20</sup>  
31  
32  
33

34 212  
35  
36 213 The physical activity assessments in each study were based on self-reported assessment tools. Four  
37  
38 214 studies used the Corpus Christi Heart Project questionnaire;<sup>12,14,20,22</sup> three studies used a structured  
39  
40 215 questionnaire confirmed by the Minnesota Leisure Time Physical Activity Questionnaire<sup>13</sup> or the Baecke  
41  
42 216 Usual Physical Activity questionnaire;<sup>15,16</sup> two studies used the Physical Activity Scale for the  
43  
44 217 Elderly;<sup>17,19</sup> one study used the Harvard Alumni Questionnaire;<sup>18</sup> and one study used The Health and  
45  
46 218 Retirement Survey physical activity-related questions.<sup>21</sup>  
47  
48  
49  
50  
51  
52  
53  
54  
55  
56  
57  
58  
59  
60

**Running Head:** PA and post-cardiac surgical outcomes

12

1  
2  
3 219 **MACCE**  
4  
5  
6 220

7 221 Outcomes within the definition of MACCE were evaluated in four studies (Table 2).<sup>13,15,17,22</sup> The  
8  
9  
10 222 follow-up periods were one,<sup>13</sup> two,<sup>15,22</sup> and five years<sup>17</sup> postoperatively. Unadjusted differences between  
11  
12 223 active versus inactive patients and MACCE (defined as atrial fibrillation, hospital admission, reoperation  
13  
14 224 and MI) were found one-year postoperatively in one study.<sup>13</sup> Another study found no differences (defined  
15  
16 225 as mortality, re-hospitalization, cerebrovascular accident and MI) at two years postoperatively.<sup>15</sup> One  
17  
18 226 study found that unadjusted rates of mortality within two years post-surgery was significantly higher in  
19  
20 227 the active versus inactive group.<sup>22</sup> One study found a significant and dose-response relationship between  
21  
22 228 physical activity and postoperative cardiac and all-cause mortality after controlling for preoperative  
23  
24 229 demographics, medical history, medications, and clinical characteristics.<sup>17</sup>  
25  
26

27 230  
28  
29 231 **30-day events**  
30  
31 232

32  
33 233 Five studies evaluated postoperative events within 30 days of surgery (Table 2).<sup>12,16-18,20</sup> The  
34  
35 234 postoperative events measured varied significantly between the studies. Three studies examined if  
36  
37 235 physical activity was an independent protective factor against postoperative events.<sup>16,18,20</sup> Physical  
38  
39 236 activity was an independent protective factor against the combined outcome of mortality, MI, and  
40  
41 237 reoperation;<sup>16</sup> as well as postoperative atrial fibrillation;<sup>18</sup> but not for in-hospital or 30-day mortality.<sup>20</sup>  
42  
43  
44 238

45  
46 239 **Postoperative health-related QOL**  
47  
48 240

49  
50  
51 241 No studies evaluated postoperative health-related QOL.  
52

53 242  
54  
55 243  
56  
57 244 **Hospital and ICU length of stay**  
58  
59  
60

**Running Head:** PA and post-cardiac surgical outcomes

1  
2  
3 245  
4  
5 246 Three studies compared hospital length of stay between active vs. inactive cardiac surgery patients  
6  
7 247 (Table 3).<sup>12,13,16</sup> Hospital length of stay was longer in the inactive group in two of three studies. One study  
8  
9  
10 248 did not report hospital length of stay summary statistics between the active vs. inactive groups.<sup>16</sup> However  
11  
12 249 that study reported an independent association between the preoperative active vs. inactive group and a  
13  
14 250 reduced likelihood of prolonged hospital length of stay, though “prolonged” was not defined in the study.  
15  
16 251

17  
18 252 Three studies compared ICU length of stay between the preoperative physical activity groups (Table  
19  
20 253 3).<sup>12,19,20</sup> Two of three studies found that the inactive group had a significantly longer ICU length of stay  
21  
22 254 compared to the active group.<sup>12,20</sup> One study conducted a multivariate analysis, and found that the active  
23  
24 255 group was less likely to have a prolonged ICU length of stay >3 days compared to the inactive group after  
25  
26 256 controlling for age, off-pump CABG, stroke, and renal failure.<sup>19</sup>  
27  
28  
29 257

**Postoperative ADLs**

30  
31 258  
32  
33 259  
34  
35 260 One study examined the impact of preoperative physical activity and postoperative ADLs at the time of  
36  
37 261 hospital discharge and revealed no statistically significant ( $p=0.079$ ) association between the two after  
38  
39 262 adjusting for preoperative demographics and clinical variables.<sup>19</sup>  
40  
41  
42 263

**Cardiac rehabilitation attendance**

43  
44 264  
45  
46 265  
47  
48 266 No studies evaluated cardiac rehabilitation attendance postoperatively.  
49  
50  
51 267

**Postoperative physical activity behavior**

52  
53 268  
54  
55 269  
56  
57 270  
58  
59  
60

**Running Head:** PA and post-cardiac surgical outcomes

14

1  
2  
3 271 The impact of preoperative physical activity on postoperative physical activity levels was examined in  
4  
5 272 three studies (Table 3).<sup>12,14,21</sup> These studies found that the active group preoperatively was more likely to  
6  
7 273 be physically inactive postoperatively. Two of three studies completed a multivariate analyses and this  
8  
9 274 association remained statistically significant after controlling for age, gender, and preoperative clinical  
10  
11 275 characteristics.<sup>12,14</sup>  
12  
13  
14 276

15  
16 277 **Risk of bias**  
17  
18 278

19  
20 279 The risk of bias assessment via the Newcastle-Ottawa Scale can be viewed in the Supplemental Digital  
21  
22 280 Content. Since some studies assessed multiple outcomes, the risk of bias assessments were based on their  
23  
24 281 highest possible score (e.g., some outcomes were assessed with a multivariable analysis, while others  
25  
26 282 were not in the same study). All studies scored at least 3 out of 4 for the selection of study groups. There  
27  
28 283 was variability across studies for the ascertainment of exposure or outcome of interest. Total risk of bias  
29  
30 284 scores ranged from 5 to 9, suggesting the studies were of moderate to high quality, respectively.  
31  
32  
33  
34  
35  
36  
37  
38  
39  
40  
41  
42  
43  
44  
45  
46  
47  
48  
49  
50  
51  
52  
53  
54  
55  
56  
57  
58  
59  
60



1  
2  
3 285 **DISCUSSION**  
4

5 286 The purpose of this systematic review was to determine if physical activity before cardiac surgery was  
6  
7 287 associated with postoperative health outcomes. Given the different self-reported physical activity tools  
8  
9  
10 288 used, the inconsistent use of adjustment for potential confounders, and the varying outcomes evaluated for  
11  
12 289 MACCE and 30 day postoperative events, it cannot be concluded that preoperative physical activity is  
13  
14 290 associated with postoperative outcomes in adult cardiac surgery patients. This systematic review highlight  
15  
16 291 important gaps within the literature on this topic. Therefore, key recommendations for examining the  
17  
18 292 impact of preoperative physical activity behavior on post-surgical outcomes of cardiac patients are  
19  
20 293 provided (Box 1).  
21

22 294  
23  
24 295 The different self-reported physical activity tools used across the studies makes it difficult to compare  
25  
26 296 the preoperative physical activity levels of patients prior to cardiac surgery. There seems to be no  
27  
28 297 universally accepted tool to measure self-reported physical activity levels.<sup>23</sup> One advantage of using self-  
29  
30 298 reported physical activity measures in studies is their ease of administration compared to other objectively  
31  
32 299 measured physical activity tools. Furthermore, self-reported physical activity tools appear to provide  
33  
34 300 some value when assessing the independent association between activity levels and poor outcomes. In  
35  
36 301 fact, most physical activity guideline recommendations for health benefits, including those in North  
37  
38 302 America, are based on self-reported measures.<sup>24,25</sup> However, cardiac surgery patients and other patient  
39  
40 303 populations tend to misreport their physical activity levels compared to objectively measured physical  
41  
42 304 activity (e.g., accelerometers).<sup>6,26</sup> Nevertheless, this systematic review found no studies that evaluated  
43  
44 305 objectively measured physical activity before cardiac surgery and its link to postoperative health  
45  
46 306 outcomes. Evidence suggests there is a stronger association between objective measures of physical  
47  
48 307 activity and various cardiovascular and metabolic biomarkers as compared to subjective measures of  
49  
50 308 physical activity.<sup>27,28</sup> Therefore, future studies should use a physical activity tools such as accelerometers  
51  
52 309 or pedometers.  
53  
54  
55  
56  
57  
58 310  
59  
60

1  
2  
3 311 There were inconsistent findings across studies assessing the same outcomes, and many studies did not  
4  
5 312 adjust for clinically relevant variables that could influence the health outcomes of cardiac surgery  
6  
7 313 patients. Even so, some of the results of this systematic review are promising. Specifically, of the studies  
8  
9 314 which controlled for confounding variables, five studies found a protective, independent association,  
10  
11 315 between higher preoperative physical activity levels when assessing clinical outcomes, including  
12  
13 316 MACCE,<sup>17</sup> 30 day postoperative events,<sup>16,18</sup> hospital length of stay,<sup>16</sup> and ICU length of stay;<sup>19</sup> whereas,  
14  
15 317 only two studies found no protective association for 30 day postoperative events<sup>20</sup> and postoperative  
16  
17 318 ADLs.<sup>19</sup> Yet, more studies are needed to elucidate the impact of preoperative physical activity on post-  
18  
19 319 cardiac surgical outcomes that control for clinically relevant variables. Clinical variables included in the  
20  
21 320 cardiac surgical risk models (e.g., EuroSCORE, STS score) could attenuate or mitigate the relationship  
22  
23 321 between preoperative physical activity behavior and postoperative outcomes. Collectively, future studies  
24  
25 322 are needed to determine if preoperative physical activity is a protective factor for health outcomes after  
26  
27 323 cardiac surgery which control for clinically relevant variables known to impact cardiac surgery outcomes.  
28  
29  
30  
31  
32

33  
34 325 An unanticipated finding was that patients who were active before surgery had a higher likelihood of  
35  
36 326 being physically inactive postoperatively, after controlling for co-morbidities.<sup>12,14,21</sup> Healthcare providers  
37  
38 327 may have advised patients with more severe symptomology prior to surgery to refrain from physical  
39  
40 328 activity. Also, the relief of cardiac symptoms after surgery among inactive patients could have led them to  
41  
42 329 become more active postoperatively. However, these possibilities were not explored in the included  
43  
44 330 studies.  
45  
46  
47

48  
49 332 While outside the scope of this systematic review, future studies should investigate if changes to  
50  
51 333 physical activity levels prior to cardiac surgery impact long-term patient health-outcomes. Cardiac  
52  
53 334 rehabilitation programs are intended to support cardiac patients in becoming more physically active  
54  
55 335 postoperatively and it has been shown that patients who attend such programs reduce their risk for  
56  
57 336 cardiac-related mortality and hospitalization rates.<sup>29</sup> Evidence suggests that among those referred to  
58  
59  
60

**Running Head:** PA and post-cardiac surgical outcomes

1  
2  
3 337 cardiac rehabilitation after cardiac surgery, only 40% attend.<sup>6</sup> However, the literature is less clear on  
4  
5 338 whether patients who attend cardiac rehabilitation are more physically active compared to those who do  
6  
7 339 not attend. It is possible that patients who adopt and sustain a more physically active lifestyle on their  
8  
9  
10 340 own after cardiac surgery could yield similar health benefits compared to those who attend an exercise-  
11  
12 341 based rehabilitation program, but this hypothesis requires further investigation.

13  
14 342  
15  
16 343 Previous randomized controlled trials comparing an exercise program to standard care prior to elective  
17  
18 344 cardiac surgery (i.e., “Prehab”) demonstrate reductions in hospital length of stay and improvements in  
19  
20 345 walking ability postoperatively.<sup>7-9</sup> However, there were mixed findings from this systematic review when  
21  
22 346 comparing preoperative physical activity behavior and hospital stay.<sup>12,16</sup> These divergent findings suggest  
23  
24 347 either that a medically supervised and individualized physical activity program is needed to derive the  
25  
26 348 health benefits of physical activity prior to cardiac surgery, or that patients are misreporting their physical  
27  
28 349 activity behaviors. Future cohort studies in this area should address the drawbacks of the included studies  
29  
30 350 in this systematic review included in Box 1, while randomized trials should focus on whether preoperative  
31  
32 351 exercise therapy programs are feasible and efficacious in clinical practice.

33  
34 352  
35  
36  
37  
38 353 The findings of this systematic review suggest that the literature would benefit from standardization of  
39  
40 354 the definition of measures such as MACCE and postoperative events within 30 days. The heterogeneity in  
41  
42 355 reporting of outcomes can lead to considerably different conclusions across studies.<sup>30</sup> Attempts should  
43  
44 356 also be made to ensure other clinically important outcomes are captured, such as the addition of 30-day  
45  
46 357 events. Only one study in this review compared physically active versus inactive patients preoperatively  
47  
48 358 and reported on the individual postoperative events within 30 days.<sup>20</sup> Collectively, uniform outcome  
49  
50 359 reporting and appropriate outcome definitions are recommended when examining the outcomes of cardiac  
51  
52 360 surgery.<sup>30</sup>

53  
54  
55 361

**Running Head:** PA and post-cardiac surgical outcomes

18

1  
2  
3 362 Patient-oriented outcomes should also be captured to ensure that cardiac surgery is improving other  
4  
5 363 outcomes that patients value. No studies in this review determined if there was a link between  
6  
7 364 preoperative physical activity behavior and postoperative health-related QOL, and only one study  
8  
9 365 evaluated postoperative ADLs.<sup>19</sup> QOL postoperatively tends to improve in some older patients, while  
10  
11 366 others tend to decline.<sup>31</sup> Importantly, the preoperatively physical activity and overall functional status of  
12  
13 367 cardiac surgery patients could play a role in the postoperative trajectory of these outcomes such as QOL.  
14  
15 368 Other patient-oriented outcomes, including postoperative pain and cardiac symptoms, could also be  
16  
17 369 investigated.  
18  
19  
20  
21 370

### 22 371 **Limitations**

23  
24  
25 372 One limitation to consider is that the patients included across the studies evaluated in this systematic  
26  
27 373 review may have been different, as the recruitment criteria were not always clearly stated. A small sample  
28  
29 374 of studies explicitly stated that they excluded those with physical limitations and healthcare providers  
30  
31 375 may have advised higher risk patients to not participate in physical activity. There is also a limitation  
32  
33 376 associated with the methodology of this systematic review: only studies written in English were included,  
34  
35 377 raising the possibility that some studies were missed.  
36  
37  
38 378

### 39 379 **Conclusion**

40  
41  
42 380 Due to the mixed findings in this systematic review, it cannot be concluded that self-reported physical  
43  
44 381 activity behavior before cardiac surgery is associated with health outcomes after surgery. The mixed  
45  
46 382 findings could be due to the heterogeneity in physical activity tools used, definitions of outcomes, and the  
47  
48 383 few studies adjusting for other potentially confounding variables. These findings highlight the need for  
49  
50 384 more research in this area.  
51  
52  
53  
54  
55  
56  
57  
58  
59  
60

385 **REFERENCES**

- 386 1. Ferguson TB, Hammill BG, Peterson ED, DeLong ER, Grover FL, STS National Database  
387 Committee. A decade of change--risk profiles and outcomes for isolated coronary artery bypass  
388 grafting procedures, 1990-1999: a report from the STS National Database Committee and the Duke  
389 Clinical Research Institute. Society of Thoracic Surgeons. *Ann Thorac Surg.* 2002;73(2):480-489-  
390 490.
- 391 2. Pfisterer M, Buser P, Osswald S, et al. Outcome of elderly patients with chronic symptomatic  
392 coronary artery disease with an invasive vs optimized medical treatment strategy: one-year results  
393 of the randomized TIME trial. *JAMA.* 2003;289(9):1117-1123.
- 394 3. Alexander KP, Anstrom KJ, Muhlbaier LH, et al. Outcomes of cardiac surgery in patients > or = 80  
395 years: results from the National Cardiovascular Network. *J Am Coll Cardiol.* 2000;35(3):731-738.
- 396 4. Anderson L, Oldridge N, Thompson DR, et al. Exercise-Based Cardiac Rehabilitation for Coronary  
397 Heart Disease: Cochrane Systematic Review and Meta-Analysis. *J Am Coll Cardiol.* 2016;67(1):1-  
398 12. doi:10.1016/j.jacc.2015.10.044.
- 399 5. Macchi C, Polcaro P, Cecchi F, et al. One-year adherence to exercise in elderly patients receiving  
400 postacute inpatient rehabilitation after cardiac surgery. *Am J Phys Med Rehabil Assoc Acad*  
401 *Physiatr.* 2009;88(9):727-734.
- 402 6. Horne D, Kehler DS, Kaoukis G, et al. Impact of Physical Activity on Depression After  
403 CardiacSurgery. *Can J Cardiol.* 2013;29(12):1649-1656.
- 404 7. Arthur HM, Daniels C, McKelvie R, Hirsh J, Rush B. Effect of a preoperative intervention on  
405 preoperative and postoperative outcomes in low-risk patients awaiting elective coronary artery  
406 bypass graft surgery. A randomized, controlled trial. *Ann Intern Med.* 2000;133(4):253-262.
- 407 8. Sawatzky JV, Kehler DS, Ready AE, et al. Prehabilitation program for elective coronary artery  
408 bypass graft surgery patients: a pilot randomized controlled study. *Clin Rehabil.* 2013;In press.
- 409 9. Herdy AH, Marcelli PL, Vila A, et al. Pre- and postoperative cardiopulmonary rehabilitation in  
410 hospitalized patients undergoing coronary artery bypass surgery: a randomized controlled trial. *Am J*

- 1  
2  
3 411 *Phys Med Rehabil Assoc Acad Physiatr.* 2008;87(9):714-719.  
4  
5 412 doi:10.1097/PHM.0b013e3181839152.  
6  
7  
8 413 10. Society of Thoracic Surgeons. General Thoracic Surgery Database. [http://www.sts.org/sts-national-](http://www.sts.org/sts-national-database/database-managers/general-thoracic-surgery-database)  
9  
10 414 [database/database-managers/general-thoracic-surgery-database](http://www.sts.org/sts-national-database/database-managers/general-thoracic-surgery-database). Accessed February 17, 2015.  
11  
12 415 11. Wells GA, Shea B, O'Connell D, et al. The Newcastle-Ottawa Scale (NOS) for assessing the quality  
13  
14 416 of nonrandomised studies in meta-analyses.  
15  
16 417 [http://www.ohri.ca/programs/clinical\\_epidemiology/oxford.asp](http://www.ohri.ca/programs/clinical_epidemiology/oxford.asp). Published 2011. Accessed January  
17  
18 418 25, 2015.  
19  
20 419 12. Markou AL, Lasten PJ, Noyez L. Physical activity post myocardial revascularization. Will surgery  
21  
22 420 improve my mobility?. *J Cardiovasc Surg (Torino)*. 2007;48(2):201-206.  
23  
24 421 13. Nery RM, Barbisan JN, Mahmud MI. Influence of the practice physical activity in the coronary  
25  
26 422 artery bypass graft surgery results. *Braz J Cardiovasc Surg.* 2007;22(3):297-302.  
27  
28 423 14. Markou AL, Evers M, van Swieten HA, Noyez L. Gender and physical activity one year after  
29  
30 424 myocardial revascularization for stable angina. *Interact Cardiovasc Thorac Surg.* 2008;7(1):96-100.  
31  
32 425 15. Martini MR, Barbisan JN. Influence of physical activity during leisure time in patients in the  
33  
34 426 follow-up two years after CABG. *Rev Bras Cir Cardiovasc Orgao Of Soc Bras Cir Cardiovasc.*  
35  
36 427 2010;25(3):359-364.  
37  
38 428 16. Nery RM, Barbisan JN. Effect of leisure-time physical activity on the prognosis of coronary artery  
39  
40 429 bypass graft surgery. *Rev Bras Cir Cardiovasc Orgao Of Soc Bras Cir Cardiovasc.* 2010;25(1):73-  
41  
42 430 78.  
43  
44 431 17. Rengo G, Galasso G, Vitale DF, et al. An active lifestyle prior to coronary surgery is associated  
45  
46 432 with improved survival in elderly patients. *J Gerontol A Biol Sci Med Sci.* 2010;65(7):758-763.  
47  
48 433 doi:10.1093/gerona/glp216.  
49  
50 434 18. Giaccardi M, MacChi C, Colella A, et al. Postacute rehabilitation after coronary surgery: The effect  
51  
52 435 of preoperative physical activity on the incidence of paroxysmal atrial fibrillation. *Am J Phys Med*  
53  
54 436 *Rehabil.* 2011;90(4):308-315.  
55  
56  
57  
58  
59  
60

- 1  
2  
3 437 19. Cacciatore F, Anello CB, Ferrara N, et al. Determinants of prolonged intensive care unit stay after  
4  
5 438 cardiac surgery in the elderly. *Aging Clin Exp Res*. 2012;24(6):627-634.  
6  
7  
8 439 20. Noyez L, Biemans I, Verkroost M, van Swieten H. Is a sedentary lifestyle an independent predictor  
9  
10 440 for hospital and early mortality after elective cardiac surgery?. *Neth Heart J*. 2013;21(10):439-445.  
11  
12 441 21. Min L, Mazzurco L, Gure TR, et al. Longitudinal functional recovery after geriatric cardiac surgery.  
13  
14 442 *J Surg Res*. 2015;194(1):25-33.  
15  
16 443 22. van Laar C, Kievit PC, Noyez L. Surgical aortic valve replacement in patients older than 75 years:  
17  
18 444 is there really a quality of life benefit?. *Neth Heart J*. 2015;23(3):174-179.  
19  
20 445 23. van Poppel MN, Chinapaw MJ, Mokkink LB, van Mechelen W, Terwee CB. Physical activity  
21  
22 446 questionnaires for adults: a systematic review of measurement properties. *Sports Med Auckl NZ*.  
23  
24 447 2010;40(7):565-600. doi:10.2165/11531930-000000000-00000;  
25  
26  
27 448 24. Tremblay MS, Warburton DER, Janssen I, et al. New Canadian physical activity guidelines. *Appl*  
28  
29 449 *Physiol Nutr Metab Physiol Appliquée Nutr Métabolisme*. 2011;36(1):36-46-58. doi:10.1139/H11-  
30  
31 450 009.  
32  
33 451 25. Physical Activity Guidelines Advisory Committee. *Physical Activity Guidelines Advisory*  
34  
35 452 *Committee Report*. Washington, DC: U.S.: Department of Health and Human Services; 2008.  
36  
37 453 26. Lee PH, Macfarlane DJ, Lam TH, Stewart SM. Validity of the International Physical Activity  
38  
39 454 Questionnaire Short Form (IPAQ-SF): a systematic review. *Int J Behav Nutr Phys Act*. 2011;8.  
40  
41 455 doi:10.1186/1479-5868-8-115.  
42  
43 456 27. Schmidt MD, Cleland VJ, Thomson RJ, Dwyer T, Venn AJ. A comparison of subjective and  
44  
45 457 objective measures of physical activity and fitness in identifying associations with cardiometabolic  
46  
47 458 risk factors. *Ann Epidemiol*. 2008;18(5):378-386. doi:10.1016/j.annepidem.2008.01.005.  
48  
49 459 28. Atienza AA, Moser RP, Perna F, et al. Self-reported and objectively measured activity related to  
50  
51 460 biomarkers using NHANES. *Med Sci Sports Exerc*. 2011;43(5):815-821.  
52  
53 461 doi:10.1249/MSS.0b013e3181fdfc32.  
54  
55  
56  
57  
58  
59  
60

- 1  
2  
3 462 29. Anderson L, Thompson DR, Oldridge N, et al. Exercise-based cardiac rehabilitation for coronary  
4  
5 463 heart disease. *Cochrane Database Syst Rev.* 2016;1:CD001800.  
6  
7 464 doi:10.1002/14651858.CD001800.pub3.  
8  
9  
10 465 30. Goldfarb M, Drudi L, Almohammadi M, et al. Outcome Reporting in Cardiac Surgery Trials:  
11  
12 466 Systematic Review and Critical Appraisal. *J Am Heart Assoc.* 2015;4(8):e002204.  
13  
14 467 doi:10.1161/JAHA.115.002204.  
15  
16 468 31. Abah U, Dunne M, Cook A, et al. Does quality of life improve in octogenarians following cardiac  
17  
18 469 surgery? A systematic review. *BMJ Open.* 2015;5(4):e006904. doi:10.1136/bmjopen-2014-006904.  
19  
20  
21  
22  
23  
24  
25  
26  
27  
28  
29  
30  
31  
32  
33  
34  
35  
36  
37  
38  
39  
40  
41  
42  
43  
44  
45  
46  
47  
48  
49  
50  
51  
52  
53  
54  
55  
56  
57  
58  
59  
60



**Running Head:** PA and post-cardiac surgical outcomes

**FIGURE LEGENDS**

**Figure 1.** Study flow diagram.

For peer review only

1  
2  
3  
4  
5  
6  
7  
8  
9  
10  
11  
12  
13  
14  
15  
16  
17  
18  
19  
20  
21  
22  
23  
24  
25  
26  
27  
28  
29  
30  
31  
32  
33  
34  
35  
36  
37  
38  
39  
40  
41  
42  
43  
44  
45  
46  
47  
48  
49  
50  
51  
52  
53  
54  
55  
56  
57  
58  
59  
60

**Running Head:** PA and post-cardiac surgical outcomes

24

**Table 1.** Characteristics of included studies.

| First author, year            | Study Population                                                                                                          | Country     | Participants at follow-up | Physical Activity Assessment                                                                 | Longest follow-up          | Main findings                                                                                                                                                                                                                               |
|-------------------------------|---------------------------------------------------------------------------------------------------------------------------|-------------|---------------------------|----------------------------------------------------------------------------------------------|----------------------------|---------------------------------------------------------------------------------------------------------------------------------------------------------------------------------------------------------------------------------------------|
| Giaccardi, 2011 <sup>18</sup> | All patients $\geq 65$ years undergoing CABG and/or valve procedures (total sample: $74.1 \pm 5.8$ years old); 43% female | Italy       | 158                       | Harvard Alumni Questionnaire                                                                 | Four weeks postoperatively | Physical activity had an independent association with postoperative atrial fibrillation within 30 days.                                                                                                                                     |
| Markou, 2007 <sup>12</sup>    | Elective CABG patients (Active: $64.4 \pm 9.4$ , Inactive: $63.8 \pm 9.0$ years old); % female not reported               | Netherlands | 428                       | The Corpus Christi Heart Project                                                             | One year                   | Inactive vs. Active group had significantly more peri-operative MIs, but not reoperations, ICU LOS, HLOS, or postoperative complications at one year. Inactive group was more likely than Active group to be physically active at one year. |
| Nery, 2007 <sup>13</sup>      | All patients undergoing CABG (Active: $63 \pm 11$ , Inactive $66 \pm 14$ years old); 42% female                           | Brazil      | 55                        | Structured Questionnaire confirmed by Minnesota Leisure Time Physical Activity Questionnaire | One year                   | Inactive vs. Active group had significantly longer HLOS and more postoperative events at one year.                                                                                                                                          |
| Markou, 2008 <sup>14</sup>    | Elective CABG patients ( $64.3 \pm 9.04$ years old); 18% female                                                           | Netherlands | 568                       | The Corpus Christi Heart Project                                                             | One year                   | Inactive vs. Active group were more likely to be more physically active one year postoperatively.                                                                                                                                           |
| Martini, 2010 <sup>15</sup>   | Elective CABG patients (Active: $60 \pm 10$ , Inactive: $62 \pm 10$ years old); 34% female                                | Brazil      | 185                       | Baecke Usual Physical Activity Questionnaire                                                 | Two years                  | Inactive vs. Active group did not have significantly different MACCE outcomes at two years.                                                                                                                                                 |

## Running Head: PA and post-cardiac surgical outcomes

25

|    |                         |                                      |               |      |                   |               |                                   |
|----|-------------------------|--------------------------------------|---------------|------|-------------------|---------------|-----------------------------------|
| 1  |                         |                                      |               |      |                   |               |                                   |
| 2  |                         |                                      |               |      |                   |               |                                   |
| 3  | Nery,                   | Elective CABG patients (Active:      | Brazil        | 202  | Baecke Usual      | Hospital      | Inactive vs. Active group had     |
| 4  | 2010 <sup>16</sup>      | 60 ± 10, Inactive: 62 ± 10 years     |               |      | Physical Activity | discharge     | more postoperative events         |
| 5  |                         | old); 34% female                     |               |      | Questionnaire     |               | within 30 days and a longer       |
| 6  |                         |                                      |               |      |                   |               | HLOS.                             |
| 7  |                         |                                      |               |      |                   |               |                                   |
| 8  |                         |                                      |               |      |                   |               |                                   |
| 9  | Rengo,                  | Acute or elective CABG patients ≥    | Italy         | 587  | Physical Activity | Mean 44.3 ±   | Physical activity had an          |
| 10 | 2010 <sup>17</sup>      | 70 years (Active: 72.3 ± 3.2,        |               |      | Scale for the     | 21.0 months   | independent and dose              |
| 11 |                         | Inactive: 76.1 ± 3.9 years old); 34% |               |      | Elderly           |               | association with cardiac and all- |
| 12 |                         | female                               |               |      |                   |               | cause mortality five years        |
| 13 |                         |                                      |               |      |                   |               | postoperatively.                  |
| 14 | Cacciatore,             | All patients ≥ 65 years undergoing   | Italy         | 250  | Physical Activity | Hospital      | Physical activity was             |
| 15 | 2012 <sup>19</sup>      | CABG and/or valve procedures         |               |      | Scale for the     | discharge     | independently associated with     |
| 16 |                         | (72.9 ± 4.8 years old); 48% female   |               |      | Elderly           |               | reduced prolonged ICU LOS.        |
| 17 |                         |                                      |               |      |                   |               | Physical activity was not         |
| 18 |                         |                                      |               |      |                   |               | independently associated with     |
| 19 |                         |                                      |               |      |                   |               | postoperative ADLs.               |
| 20 |                         |                                      |               |      |                   |               |                                   |
| 21 |                         |                                      |               |      |                   |               |                                   |
| 22 | Noyez,                  | Elective CABG and/or valve           | Netherlands   | 3150 | The Corpus        | 30 days       | Physical activity was not         |
| 23 | 2013 <sup>20</sup>      | patients (69.7 ± 10.1 years old);    |               |      | Christi Heart     | postoperative | independently associated with     |
| 24 |                         |                                      |               |      | Project           | ly            | hospital or 30 day mortality.     |
| 25 |                         |                                      |               |      |                   |               | Inactive vs. Active group had a   |
| 26 |                         |                                      |               |      |                   |               | significantly longer ICU LOS.     |
| 27 |                         |                                      |               |      |                   |               |                                   |
| 28 | Min, 2015 <sup>21</sup> | Elective CABG and/or valve           | United States | 62   | The Health and    | 4-6 months    | Inactive vs. Active group had     |
| 29 |                         | patients ≥ 65 years (74.7 ± 5.9      | of America    |      | Retirement        |               | significantly higher              |
| 30 |                         | years old)                           |               |      | Survey            |               | postoperative physical activity   |
| 31 |                         |                                      |               |      |                   |               | up to 6 months postoperatively.   |
| 32 |                         |                                      |               |      |                   |               |                                   |
| 33 |                         |                                      |               |      |                   |               |                                   |
| 34 | van Laar <sup>22</sup>  | Patients ≥75 years undergoing        | Netherlands   | 115  | The Corpus        | 2 years       | Inactive vs. Active group had     |
| 35 |                         | elective isolated aortic valve       |               |      | Christi Heart     | postoperative | significantly higher mortality    |
| 36 |                         | replacement (79.5 ± 2.8 years old);  |               |      | Project           | ly            | rates 2 years postoperatively.    |
| 37 |                         | 59% female                           |               |      |                   |               |                                   |

CABG, coronary artery bypass graft surgery; HLOS, hospital length of stay; ICU LOS, intensive care unit length of stay; MI, myocardial infarction; MACCE, major adverse cerebrovascular and cardiac events; ADL, activities of daily living.

Table 2. Major adverse and cerebrovascular events and postoperative events within 30 days

| Reference                                               | Outcome definition                                                                                                       | Adjustment variables                                               | Number of events per group                                                                                                                                                                                                                               | OR or HR and 95% CI                                                                                                                                                                            |
|---------------------------------------------------------|--------------------------------------------------------------------------------------------------------------------------|--------------------------------------------------------------------|----------------------------------------------------------------------------------------------------------------------------------------------------------------------------------------------------------------------------------------------------------|------------------------------------------------------------------------------------------------------------------------------------------------------------------------------------------------|
| <b>Major adverse cerebrovascular and cardiac events</b> |                                                                                                                          |                                                                    |                                                                                                                                                                                                                                                          |                                                                                                                                                                                                |
| Nery, 2007 <sup>13</sup>                                | One year postoperative AF, hospital readmission, new CABG, PCI, MI                                                       | None                                                               | Active: 8/25 (31%); Inactive: 17/30 (57%) <sup>a</sup>                                                                                                                                                                                                   | NR                                                                                                                                                                                             |
| Martini, 2010 <sup>15</sup>                             | Two year postoperative death, re-hospitalization, cerebrovascular accident, MI                                           | None                                                               | Active: 9/66 (14%); Inactive: 31/119 (26%)                                                                                                                                                                                                               | NR                                                                                                                                                                                             |
| Rengo, 2010 <sup>17</sup>                               | Five-year postoperative cardiac and all-cause mortality                                                                  | Demographics, medical history, medications, and clinical findings. | NR                                                                                                                                                                                                                                                       | <u>Adjusted proportional hazard models:</u><br><i>All-cause mortality:</i> Exp(B) 0.248 (95% CI 0.141-0.434) <sup>a</sup><br><i>Cardiac mortality:</i> Exp(B) 0.272 (0.133-0.555) <sup>a</sup> |
| van Laar <sup>22</sup>                                  | Two-year mortality                                                                                                       | None                                                               | Active: 5/65 (13%); Inactive: 11/50 (22%) <sup>a</sup>                                                                                                                                                                                                   | NR                                                                                                                                                                                             |
| <b>Postoperative events within 30 days</b>              |                                                                                                                          |                                                                    |                                                                                                                                                                                                                                                          |                                                                                                                                                                                                |
| Markou, 2007 <sup>12</sup>                              | Perioperative MI, Re-intervention, postoperative complications (wound, renal, neurological, pulmonary, gastrointestinal) | None                                                               | <u>MI:</u> Active: 4/226 (2%); Inactive: 11/202 (5%) <sup>a</sup><br><u>Reoperation:</u> Active: 15/226 (7%); Inactive: 9/202 (5%),<br><u>Wound infection:</u> Active: 3/226 (1%); Inactive: 7/202 (3%),<br><u>Renal:</u> Active: 3/226; Inactive: 7/202 | NR                                                                                                                                                                                             |
| Nery, 2010 <sup>16</sup>                                | Mortality, MI, reoperation                                                                                               | Age, smoking, PVD, COPD, Cleveland Risk Score.                     | <u>Mortality:</u> Active: 0/66 (0%); Inactive: 7/136 (5%)<br><u>MI:</u> Active: 1/66 (2%); Inactive: 6/136 (4%)<br><u>Reoperation:</u> Active: 0/66 (0%); Inactive: 1/136 (0.5%)                                                                         | <u>Multivariate OR for being active:</u> 0.22 (95% CI 0.09-0.51, p=0.001)                                                                                                                      |

## Running Head: PA and post-cardiac surgical outcomes

27

|    |                               |                                                                                                  |                                                                                                                                                                            |                                                                                                                                                                                                                                                                                                                                                                                                                                                                                                                                                                                                                |                                                                                                                                                                                           |
|----|-------------------------------|--------------------------------------------------------------------------------------------------|----------------------------------------------------------------------------------------------------------------------------------------------------------------------------|----------------------------------------------------------------------------------------------------------------------------------------------------------------------------------------------------------------------------------------------------------------------------------------------------------------------------------------------------------------------------------------------------------------------------------------------------------------------------------------------------------------------------------------------------------------------------------------------------------------|-------------------------------------------------------------------------------------------------------------------------------------------------------------------------------------------|
| 1  |                               |                                                                                                  |                                                                                                                                                                            |                                                                                                                                                                                                                                                                                                                                                                                                                                                                                                                                                                                                                |                                                                                                                                                                                           |
| 2  |                               |                                                                                                  |                                                                                                                                                                            |                                                                                                                                                                                                                                                                                                                                                                                                                                                                                                                                                                                                                |                                                                                                                                                                                           |
| 3  | Rengo, 2010 <sup>17</sup>     | Low-output syndromes, MI, cardiac support, stroke, bleedings, mediastinitis, pneumonia, dialysis | None                                                                                                                                                                       | <u>Any surgical complication:</u><br>Active: 53/267 (19.7%); Inactive: 60/320 (18.6%)                                                                                                                                                                                                                                                                                                                                                                                                                                                                                                                          | NR                                                                                                                                                                                        |
| 4  |                               |                                                                                                  |                                                                                                                                                                            |                                                                                                                                                                                                                                                                                                                                                                                                                                                                                                                                                                                                                |                                                                                                                                                                                           |
| 5  |                               |                                                                                                  |                                                                                                                                                                            |                                                                                                                                                                                                                                                                                                                                                                                                                                                                                                                                                                                                                |                                                                                                                                                                                           |
| 6  |                               |                                                                                                  |                                                                                                                                                                            |                                                                                                                                                                                                                                                                                                                                                                                                                                                                                                                                                                                                                |                                                                                                                                                                                           |
| 7  |                               |                                                                                                  |                                                                                                                                                                            |                                                                                                                                                                                                                                                                                                                                                                                                                                                                                                                                                                                                                |                                                                                                                                                                                           |
| 8  |                               |                                                                                                  |                                                                                                                                                                            |                                                                                                                                                                                                                                                                                                                                                                                                                                                                                                                                                                                                                |                                                                                                                                                                                           |
| 9  | Giaccardi, 2011 <sup>18</sup> | Atrial fibrillation                                                                              | Age, episodes of AF one year preop, episodes of AF in the first week, $\beta$ -blockers, amiodarone, left ventricular volume, left atrial emptying fraction                | <u>Postoperative atrial fibrillation:</u> Active: 6/74 (8.1%); Inactive: 27/84 (32.1%) <sup>a</sup>                                                                                                                                                                                                                                                                                                                                                                                                                                                                                                            | <u>Multivariate OR for being inactive:</u> 4.04 (95% CI 1.16-14.14, p=0.029)                                                                                                              |
| 10 |                               |                                                                                                  |                                                                                                                                                                            |                                                                                                                                                                                                                                                                                                                                                                                                                                                                                                                                                                                                                |                                                                                                                                                                                           |
| 11 |                               |                                                                                                  |                                                                                                                                                                            |                                                                                                                                                                                                                                                                                                                                                                                                                                                                                                                                                                                                                |                                                                                                                                                                                           |
| 12 |                               |                                                                                                  |                                                                                                                                                                            |                                                                                                                                                                                                                                                                                                                                                                                                                                                                                                                                                                                                                |                                                                                                                                                                                           |
| 13 |                               |                                                                                                  |                                                                                                                                                                            |                                                                                                                                                                                                                                                                                                                                                                                                                                                                                                                                                                                                                |                                                                                                                                                                                           |
| 14 |                               |                                                                                                  |                                                                                                                                                                            |                                                                                                                                                                                                                                                                                                                                                                                                                                                                                                                                                                                                                |                                                                                                                                                                                           |
| 15 |                               |                                                                                                  |                                                                                                                                                                            |                                                                                                                                                                                                                                                                                                                                                                                                                                                                                                                                                                                                                |                                                                                                                                                                                           |
| 16 |                               |                                                                                                  |                                                                                                                                                                            |                                                                                                                                                                                                                                                                                                                                                                                                                                                                                                                                                                                                                |                                                                                                                                                                                           |
| 17 |                               |                                                                                                  |                                                                                                                                                                            |                                                                                                                                                                                                                                                                                                                                                                                                                                                                                                                                                                                                                |                                                                                                                                                                                           |
| 18 |                               |                                                                                                  |                                                                                                                                                                            |                                                                                                                                                                                                                                                                                                                                                                                                                                                                                                                                                                                                                |                                                                                                                                                                                           |
| 19 |                               |                                                                                                  |                                                                                                                                                                            |                                                                                                                                                                                                                                                                                                                                                                                                                                                                                                                                                                                                                |                                                                                                                                                                                           |
| 20 | Noyez, 2013 <sup>20</sup>     | Mortality, reoperation, stroke, renal insufficiency, sternal wound, ventilation                  | $\geq 75$ years, valve surgery, female, high operative risk, renal disease, obesity, NYHA IV, Insulin, vascular pathology, poor LVEF, lung disease, MI, neurological event | <u>Hospital mortality:</u> Active: 7/1815 (0.4%); Inactive: 15/1335 (1.1%) <sup>a</sup><br><u>30 day mortality:</u> Active: 10/1815 (0.6%); Inactive: 20/1335 (1.5%) <sup>a</sup><br><u>Reoperation:</u> Active: 105/1815 (5.8%); Inactive: 68/1335 (5%)<br><u>Stroke:</u> Active: 9/1815 (0.5%); Inactive: 12/1335 (0.9%)<br><u>Renal insufficiency:</u> Active: 32/1815 (1.8%); Inactive: 39/1335 (2.9%) <sup>a</sup><br><u>Sternal wound:</u> Active: 10/1815 (0.6%); Inactive: 17/1335 (1.3%) <sup>a</sup><br><u>Ventilation &gt;2 days:</u> Active: 31/1815 (1.7%); Inactive: 54/1335 (4.0%) <sup>a</sup> | <u>Hospital mortality multivariate OR for being inactive:</u> 1.20 (95% CI 0.4-3.5, p=0.617)<br><u>30 day mortality multivariate OR for being inactive:</u> 1.10 (95% CI 0.5-2.7, p=0.70) |
| 21 |                               |                                                                                                  |                                                                                                                                                                            |                                                                                                                                                                                                                                                                                                                                                                                                                                                                                                                                                                                                                |                                                                                                                                                                                           |
| 22 |                               |                                                                                                  |                                                                                                                                                                            |                                                                                                                                                                                                                                                                                                                                                                                                                                                                                                                                                                                                                |                                                                                                                                                                                           |
| 23 |                               |                                                                                                  |                                                                                                                                                                            |                                                                                                                                                                                                                                                                                                                                                                                                                                                                                                                                                                                                                |                                                                                                                                                                                           |
| 24 |                               |                                                                                                  |                                                                                                                                                                            |                                                                                                                                                                                                                                                                                                                                                                                                                                                                                                                                                                                                                |                                                                                                                                                                                           |
| 25 |                               |                                                                                                  |                                                                                                                                                                            |                                                                                                                                                                                                                                                                                                                                                                                                                                                                                                                                                                                                                |                                                                                                                                                                                           |
| 26 |                               |                                                                                                  |                                                                                                                                                                            |                                                                                                                                                                                                                                                                                                                                                                                                                                                                                                                                                                                                                |                                                                                                                                                                                           |
| 27 |                               |                                                                                                  |                                                                                                                                                                            |                                                                                                                                                                                                                                                                                                                                                                                                                                                                                                                                                                                                                |                                                                                                                                                                                           |
| 28 |                               |                                                                                                  |                                                                                                                                                                            |                                                                                                                                                                                                                                                                                                                                                                                                                                                                                                                                                                                                                |                                                                                                                                                                                           |
| 29 |                               |                                                                                                  |                                                                                                                                                                            |                                                                                                                                                                                                                                                                                                                                                                                                                                                                                                                                                                                                                |                                                                                                                                                                                           |
| 30 |                               |                                                                                                  |                                                                                                                                                                            |                                                                                                                                                                                                                                                                                                                                                                                                                                                                                                                                                                                                                |                                                                                                                                                                                           |
| 31 |                               |                                                                                                  |                                                                                                                                                                            |                                                                                                                                                                                                                                                                                                                                                                                                                                                                                                                                                                                                                |                                                                                                                                                                                           |
| 32 |                               |                                                                                                  |                                                                                                                                                                            |                                                                                                                                                                                                                                                                                                                                                                                                                                                                                                                                                                                                                |                                                                                                                                                                                           |
| 33 |                               |                                                                                                  |                                                                                                                                                                            |                                                                                                                                                                                                                                                                                                                                                                                                                                                                                                                                                                                                                |                                                                                                                                                                                           |
| 34 |                               |                                                                                                  |                                                                                                                                                                            |                                                                                                                                                                                                                                                                                                                                                                                                                                                                                                                                                                                                                |                                                                                                                                                                                           |

<sup>a</sup> indicates statistical significance (P<0.05). CABG, coronary artery bypass graft; PCI, percutaneous coronary intervention; MI, myocardial infarction; NR, not reported; PVD, peripheral vascular disease; COPD, chronic obstructive pulmonary disease; OR, odds ratio; AF, atrial fibrillation; BMI, body mass index; NYHA, New York Heart Association; LVEF, left ventricular ejection fraction.

Running Head: PA and post-cardiac surgical outcomes

28

**Table 3.** Hospital length of stay, ICU length of stay, and postoperative activities of daily living and physical activity.

| First author, year             | Adjustment variables                                                                          | Length of stay/number of events per group                                                               | Odds ratio (OR) or hazard ratio (HR) and 95% confidence interval (CI)                                                                                          |
|--------------------------------|-----------------------------------------------------------------------------------------------|---------------------------------------------------------------------------------------------------------|----------------------------------------------------------------------------------------------------------------------------------------------------------------|
| <b>Hospital length of stay</b> |                                                                                               |                                                                                                         |                                                                                                                                                                |
| Markou, 2007 <sup>12</sup>     | None                                                                                          | Active: 6.9 ± 8.2 days; Inactive: 7.3 ± 7.1 days                                                        | NR                                                                                                                                                             |
| Nery, 2007 <sup>13</sup>       | None                                                                                          | Active: 12 ± 5 days, median 9 days (IQR 8-15); Inactive: 15 ± 8 days, median 12 (IQR 9-19) <sup>a</sup> | NR                                                                                                                                                             |
| Nery, 2010 <sup>16</sup>       | Age, sex, Cleveland Risk Score, smoking, systemic arterial hypertension, stroke, MI, and PVD. | NR                                                                                                      | HR: 0.67 (95% CI 0.49-0.93) <sup>a</sup>                                                                                                                       |
| <b>ICU length of stay</b>      |                                                                                               |                                                                                                         |                                                                                                                                                                |
| Markou, 2007 <sup>12</sup>     | None                                                                                          | Active: 2.2 ± 5.3 days; Inactive: 2.1 ± 3.5 days                                                        | NR                                                                                                                                                             |
| Cacciatore, 2012 <sup>19</sup> | For ICU LOS >3 days: age, off-pump CABG, stroke, renal failure.                               | Active: 2.58 ± 1.09 days; Inactive: 3.33 ± 1.68 days <sup>a,b</sup>                                     | <u>For ICU length of stay &gt;3 days</u><br>Univariate OR: 0.984 (95% CI 0.977-0.992) <sup>a</sup><br>Multivariate OR: 0.992 (95% CI 0.983-1.000) <sup>a</sup> |
| Noyez, 2013 <sup>20</sup>      | None                                                                                          | Active: 1.3 ± 1.9 days; Inactive 3.0 ± 41.8 days <sup>a</sup>                                           | NR                                                                                                                                                             |
|                                |                                                                                               | ICU > 5 days: Active: 19/1815 (1.0%); Inactive: 46/1335 (3.4%) <sup>a</sup>                             |                                                                                                                                                                |
| <b>Postoperative ADLs</b>      |                                                                                               |                                                                                                         |                                                                                                                                                                |
| Cacciatore,                    | Age, gender, CABG, NYHA ≥3,                                                                   | NR                                                                                                      | Beta: 0.099                                                                                                                                                    |

**Running Head:** PA and post-cardiac surgical outcomes

29

2012<sup>19</sup> ICU LOS  $\geq$ 3 days, Off-pump CABG, diabetes, renal failure, stroke, PVD, COPD, Cumulative Illness Rating Scale.

### Postoperative Physical activity

Markou, 2007<sup>12</sup> Age  $\geq$ 75 years, gender, neurological disease, vascular disease, diabetes, and preoperative physical activity.

Better PA post-operatively: Active: 48/226 (21.2 %), Inactive: 129/202 (64%)<sup>a</sup>

Equal PA post-operatively: Active: 112/226 (49.6%), Inactive: 59/202 (29.2%)<sup>a</sup>

Worse PA postoperatively: Active: 66/226 (29.2%), Inactive: 14/202 (6.9%)<sup>a</sup>

Decreased postoperative PA OR (inactive group as reference): 8.1 (95% CI 3.5-13.5)<sup>a</sup>

Markou, 2008<sup>14</sup> Diabetes, vascular disease, neurological disease, renal disease, MI, preoperative activity level.

NR

For becoming physically inactive postoperatively

Male OR (inactive group as reference): 7.11 (95% CI 3.6-13.9)<sup>a</sup>

Female OR (inactive group as reference): 11.0 (95% CI 2.2-55)<sup>a</sup>

Min, 2015<sup>21</sup> None

NR

Each weekly preoperative activity point was associated with a loss of 0.78 points at 6 weeks,  $p < 0.001$ , and 0.65 points at 6 months)<sup>a</sup>

<sup>a</sup> indicates statistical significance ( $P < 0.05$ ). <sup>b</sup>Unpublished data obtained from Cacciatore et al, [19]. ICU, Intensive Care Unit; ADL; activities of daily living; IQR, interquartile range; NR, not reported; MI, myocardial infarction; PVD, peripheral vascular disease; HR, hazard ratio; OR, odds ratio; CABG, coronary artery bypass graft; NYHA, New York Heart Association; COPD, chronic obstructive pulmonary disease; PA, physical activity.

**Table 4.** Newcastle-Ottawa scale risk of bias scores

| Reference                      | Selection       | Comparability   | Outcome         | Total           |
|--------------------------------|-----------------|-----------------|-----------------|-----------------|
| Markou, 2007 <sup>12</sup>     | 3               | 2               | 3               | 8               |
| Nery, 2007 <sup>13</sup>       | 3               | 0               | 2               | 5               |
| Markou, 2008 <sup>14</sup>     | 3               | 2               | 2               | 7               |
| Martini, 2010 <sup>15</sup>    | 3               | 0               | 2               | 5               |
| Nery, 2010 <sup>16</sup>       | 3               | 2               | 2               | 7               |
| Rengo, 2010 <sup>17</sup>      | 4               | 2               | 3               | 9               |
| Giaccardi, 2011 <sup>18</sup>  | 3               | 2               | 2               | 7               |
| Cacciatore, 2012 <sup>19</sup> | 3               | 2               | 2               | 7               |
| Noyez, 2013 <sup>20</sup>      | 3               | 2               | 3               | 8               |
| Min, 2015 <sup>21</sup>        | 4               | 2               | 1               | 7               |
| van Laar <sup>22</sup>         | 3               | 0               | 3               | 6               |
| Average scores $\pm$ SD        | 3.18 $\pm$ 0.40 | 1.45 $\pm$ 0.93 | 2.27 $\pm$ 0.65 | 6.91 $\pm$ 1.22 |

Maximum scores are 4, 2, and 3 for selection, comparability, and outcome, respectively.  
Maximum total score is 9. A lower score within each category and for a total score indicates a higher risk of bias.



**Running Head:** PA and post-cardiac surgical outcomes**Box 1.** Guidelines for physical activity measurement and outcome assessment in cardiac surgery patients: limitations and opportunities for future research

| <b>Drawbacks</b>                                                                 | <b>Opportunity</b>                                                                                                                                                                                                                                                                                                                                                                                                                                                                                                                                                                                                                                                                                                                         |
|----------------------------------------------------------------------------------|--------------------------------------------------------------------------------------------------------------------------------------------------------------------------------------------------------------------------------------------------------------------------------------------------------------------------------------------------------------------------------------------------------------------------------------------------------------------------------------------------------------------------------------------------------------------------------------------------------------------------------------------------------------------------------------------------------------------------------------------|
| <b>Physical activity</b>                                                         |                                                                                                                                                                                                                                                                                                                                                                                                                                                                                                                                                                                                                                                                                                                                            |
| 1. Heterogeneity in tools used across studies                                    | -use of objectively measured tools (e.g., pedometers, accelerometers) which can produce data that can be compared across studies, such as step counts, intensity, and duration of physical activity.                                                                                                                                                                                                                                                                                                                                                                                                                                                                                                                                       |
| 2. Only subjective measures were used                                            |                                                                                                                                                                                                                                                                                                                                                                                                                                                                                                                                                                                                                                                                                                                                            |
| 3. Time of preoperative physical activity assessment was unclear in most studies | -Capture physical activity behavior as soon as a patient is placed on a wait list, or in non-elective cases, as soon as possible prior to surgery.<br>-Physical activity should be assessed ideally over a 7 day period.<br>-Physical activity should be assessed by intensity and duration per week, and in steps per day.                                                                                                                                                                                                                                                                                                                                                                                                                |
| <b>Outcomes</b>                                                                  |                                                                                                                                                                                                                                                                                                                                                                                                                                                                                                                                                                                                                                                                                                                                            |
| 4. Heterogeneity in MACCE and postoperative events within 30 days definitions    | -MACCE should be evaluated as a long-term outcome and defined as death, stroke, myocardial infarction, and the need for re-do cardiac surgery. Each outcome should be evaluated individually.<br>-30-day postoperative events should be evaluated using the STS checklist: <sup>10</sup> along with reasons, evaluate unexpected return to the operating room, complications due to pulmonary, cardiovascular, gastrointestinal, hematological, urologic, infection, neurological, and other important miscellaneous outcomes (e.g., unexpected admission to ICU, or other events requiring admission to operating room requiring anesthesia.<br>-re-hospitalization for any cause after cardiac surgery should also be added to outcomes. |
| 5. No patient-oriented outcomes were assessed                                    | -Capture postoperative health-related quality of life, mental health, pain, and cardiac symptoms using validated tools within the first 30 days and at least one-year postoperatively.                                                                                                                                                                                                                                                                                                                                                                                                                                                                                                                                                     |
| <b>Statistical procedures</b>                                                    |                                                                                                                                                                                                                                                                                                                                                                                                                                                                                                                                                                                                                                                                                                                                            |
| 6. Shortage of studies addressing confounders                                    | -use multivariate analysis, including logistic or linear regression, or analysis of variance statistical procedures. Ensure that a power analysis is conducted prior to conducting the study.                                                                                                                                                                                                                                                                                                                                                                                                                                                                                                                                              |

MACCE, major adverse cerebrovascular and cardiac events. STS, Society of Thoracic Surgeons. ICU, intensive care unit.

1  
2  
3  
4  
5  
6  
7  
8  
9  
10  
11  
12  
13  
14  
15  
16  
17  
18  
19  
20  
21  
22  
23  
24  
25  
26  
27  
28  
29  
30  
31  
32  
33  
34  
35  
36  
37  
38  
39  
40  
41  
42  
43  
44  
45  
46  
47  
48  
49  
50  
51  
52  
53  
54  
55  
56  
57  
58  
59  
60

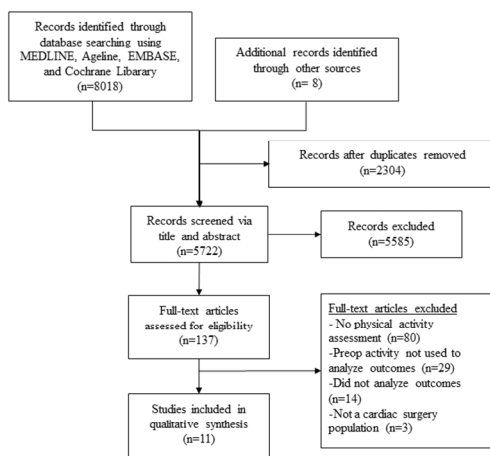

Figure 1. Study flow diagram

108x60mm (300 x 300 DPI)

review only

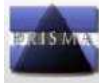

# PRISMA 2009 Checklist

1  
2  
3  
4  
5  
6  
7  
8  
9  
10  
11  
12  
13  
14  
15  
16  
17  
18  
19  
20  
21  
22  
23  
24  
25  
26  
27  
28  
29  
30  
31  
32  
33  
34  
35  
36  
37  
38  
39  
40  
41  
42  
43  
44  
45  
46  
47  
48  
49

| Section/topic                      | #  | Checklist item                                                                                                                                                                                                                                                                                              | Reported on page # |
|------------------------------------|----|-------------------------------------------------------------------------------------------------------------------------------------------------------------------------------------------------------------------------------------------------------------------------------------------------------------|--------------------|
| <b>TITLE</b>                       |    |                                                                                                                                                                                                                                                                                                             |                    |
| Title                              | 1  | Identify the report as a systematic review, meta-analysis, or both.                                                                                                                                                                                                                                         | 1                  |
| <b>ABSTRACT</b>                    |    |                                                                                                                                                                                                                                                                                                             |                    |
| Structured summary                 | 2  | Provide a structured summary including, as applicable: background; objectives; data sources; study eligibility criteria, participants, and interventions; study appraisal and synthesis methods; results; limitations; conclusions and implications of key findings; systematic review registration number. | 2                  |
| <b>INTRODUCTION</b>                |    |                                                                                                                                                                                                                                                                                                             |                    |
| Rationale                          | 3  | Describe the rationale for the review in the context of what is already known.                                                                                                                                                                                                                              | 3                  |
| Objectives                         | 4  | Provide an explicit statement of questions being addressed with reference to participants, interventions, comparisons, outcomes, and study design (PICOS).                                                                                                                                                  | 3                  |
| <b>METHODS</b>                     |    |                                                                                                                                                                                                                                                                                                             |                    |
| Protocol and registration          | 5  | Indicate if a review protocol exists, if and where it can be accessed (e.g., Web address), and, if available, provide registration information including registration number.                                                                                                                               | 4                  |
| Eligibility criteria               | 6  | Specify study characteristics (e.g., PICOS, length of follow-up) and report characteristics (e.g., years considered, language, publication status) used as criteria for eligibility, giving rationale.                                                                                                      | 4                  |
| Information sources                | 7  | Describe all information sources (e.g., databases with dates of coverage, contact with study authors to identify additional studies) in the search and date last searched.                                                                                                                                  | 5                  |
| Search                             | 8  | Present full electronic search strategy for at least one database, including any limits used, such that it could be repeated.                                                                                                                                                                               | 5 (link provided)  |
| Study selection                    | 9  | State the process for selecting studies (i.e., screening, eligibility, included in systematic review, and, if applicable, included in the meta-analysis).                                                                                                                                                   | 5                  |
| Data collection process            | 10 | Describe method of data extraction from reports (e.g., piloted forms, independently, in duplicate) and any processes for obtaining and confirming data from investigators.                                                                                                                                  | 5-6                |
| Data items                         | 11 | List and define all variables for which data were sought (e.g., PICOS, funding sources) and any assumptions and simplifications made.                                                                                                                                                                       | 6                  |
| Risk of bias in individual studies | 12 | Describe methods used for assessing risk of bias of individual studies (including specification of whether this was done at the study or outcome level), and how this information is to be used in any data synthesis.                                                                                      | 6                  |
| Summary measures                   | 13 | State the principal summary measures (e.g., risk ratio, difference in means).                                                                                                                                                                                                                               | No meta-analysis   |

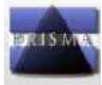

# PRISMA 2009 Checklist

|                      |    |                                                                                                                                                           |                  |
|----------------------|----|-----------------------------------------------------------------------------------------------------------------------------------------------------------|------------------|
| Synthesis of results | 14 | Describe the methods of handling data and combining results of studies, if done, including measures of consistency (e.g., $I^2$ ) for each meta-analysis. | No meta-analysis |
|----------------------|----|-----------------------------------------------------------------------------------------------------------------------------------------------------------|------------------|

Page 1 of 2

| Section/topic                 | #  | Checklist item                                                                                                                                                                                           | Reported on page #                       |
|-------------------------------|----|----------------------------------------------------------------------------------------------------------------------------------------------------------------------------------------------------------|------------------------------------------|
| Risk of bias across studies   | 15 | Specify any assessment of risk of bias that may affect the cumulative evidence (e.g., publication bias, selective reporting within studies).                                                             | N/A                                      |
| Additional analyses           | 16 | Describe methods of additional analyses (e.g., sensitivity or subgroup analyses, meta-regression), if done, indicating which were pre-specified.                                                         | N/A                                      |
| <b>RESULTS</b>                |    |                                                                                                                                                                                                          |                                          |
| Study selection               | 17 | Give numbers of studies screened, assessed for eligibility, and included in the review, with reasons for exclusions at each stage, ideally with a flow diagram.                                          | 7                                        |
| Study characteristics         | 18 | For each study, present characteristics for which data were extracted (e.g., study size, PICOS, follow-up period) and provide the citations.                                                             | 7 and in Table 1 (page 20-22)            |
| Risk of bias within studies   | 19 | Present data on risk of bias of each study and, if available, any outcome level assessment (see item 12).                                                                                                | 10 and in Table 4 (page 28)              |
| Results of individual studies | 20 | For all outcomes considered (benefits or harms), present, for each study: (a) simple summary data for each intervention group (b) effect estimates and confidence intervals, ideally with a forest plot. | 8-10 and in tables 2 and 3 (pages 23-27) |
| Synthesis of results          | 21 | Present results of each meta-analysis done, including confidence intervals and measures of consistency.                                                                                                  | No meta-analysis                         |
| Risk of bias across studies   | 22 | Present results of any assessment of risk of bias across studies (see Item 15).                                                                                                                          | 10                                       |
| Additional analysis           | 23 | Give results of additional analyses, if done (e.g., sensitivity or subgroup analyses, meta-regression [see Item 16]).                                                                                    | N/A                                      |
| <b>DISCUSSION</b>             |    |                                                                                                                                                                                                          |                                          |
| Summary of evidence           | 24 | Summarize the main findings including the strength of evidence for each main outcome; consider their relevance to key groups (e.g., healthcare providers, users, and policy makers).                     | 11                                       |

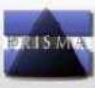

# PRISMA 2009 Checklist

1  
2  
3  
4  
5  
6  
7  
8  
9  
10  
11  
12  
13  
14  
15  
16  
17  
18  
19  
20  
21  
22  
23  
24  
25  
26  
27  
28  
29  
30  
31  
32  
33  
34  
35  
36  
37  
38  
39  
40  
41  
42  
43  
44  
45  
46  
47  
48  
49

|                |    |                                                                                                                                                               |                                   |
|----------------|----|---------------------------------------------------------------------------------------------------------------------------------------------------------------|-----------------------------------|
| Limitations    | 25 | Discuss limitations at study and outcome level (e.g., risk of bias), and at review-level (e.g., incomplete retrieval of identified research, reporting bias). | 14                                |
| Conclusions    | 26 | Provide a general interpretation of the results in the context of other evidence, and implications for future research.                                       | 14                                |
| <b>FUNDING</b> |    |                                                                                                                                                               |                                   |
| Funding        | 27 | Describe sources of funding for the systematic review and other support (e.g., supply of data); role of funders for the systematic review.                    | None. Indicated in the title page |

From: Moher D, Liberati A, Tetzlaff J, Altman DG, The PRISMA Group (2009). Preferred Reporting Items for Systematic Reviews and Meta-Analyses: The PRISMA Statement. PLoS Med 6(6): e1000097. doi:10.1371/journal.pmed1000097

For more information, visit: [www.prisma-statement.org](http://www.prisma-statement.org).

# BMJ Open

## Systematic Review of preoperative physical activity and its impact on post-cardiac surgical outcomes

|                                 |                                                                                                                                                                                                                                                                                                                                                                                                                                                                                   |
|---------------------------------|-----------------------------------------------------------------------------------------------------------------------------------------------------------------------------------------------------------------------------------------------------------------------------------------------------------------------------------------------------------------------------------------------------------------------------------------------------------------------------------|
| Journal:                        | <i>BMJ Open</i>                                                                                                                                                                                                                                                                                                                                                                                                                                                                   |
| Manuscript ID                   | bmjopen-2016-015712.R1                                                                                                                                                                                                                                                                                                                                                                                                                                                            |
| Article Type:                   | Research                                                                                                                                                                                                                                                                                                                                                                                                                                                                          |
| Date Submitted by the Author:   | 31-May-2017                                                                                                                                                                                                                                                                                                                                                                                                                                                                       |
| Complete List of Authors:       | Kehler, D. Scott<br>Stammers, Andrew N.; University of Manitoba,<br>Tangri, Navdeep; University of Manitoba, Medicine<br>Hiebert, Brett<br>Fransoo, Randy; University of Manitoba, Community Health Sciences<br>Schultz, Annette; University of Manitoba, Nursing<br>Macdonald, Kerry<br>Giacomontonio, Nicholas<br>Hassan, Ansar; New Brunswick Heart Centre,<br>Légaré, Jean-Francois<br>Arora, Rakesh C.; University of Manitoba,<br>Duhamel, Todd A.; University of Manitoba, |
| <b>Primary Subject Heading</b>: | Cardiovascular medicine                                                                                                                                                                                                                                                                                                                                                                                                                                                           |
| Secondary Subject Heading:      | Rehabilitation medicine                                                                                                                                                                                                                                                                                                                                                                                                                                                           |
| Keywords:                       | Cardiac surgery < SURGERY, REHABILITATION MEDICINE, Exercise, Postoperative complications, Prognosis                                                                                                                                                                                                                                                                                                                                                                              |
|                                 |                                                                                                                                                                                                                                                                                                                                                                                                                                                                                   |

SCHOLARONE™  
Manuscripts

Running Head: PA and post-cardiac surgical outcomes

1

1 **Title: Systematic Review of preoperative physical activity and its impact on post-cardiac surgical**  
2 **outcomes**

4 **Authors**

5 D. Scott Kehler, MSc,<sup>§1,2</sup> Andrew N. Stammers, B. Kin,<sup>1,2</sup> Navdeep Tangri, PhD,<sup>3</sup> Brett Hiebert, MSc,<sup>4</sup>

6 Randy Fransoo, PhD,<sup>5</sup> Annette S. Schultz, RN, PhD,<sup>6</sup> Kerry Macdonald, MLIS,<sup>7</sup> Nicholas

7 Giacomantonio, MD, FRCPC,<sup>8</sup> Ansar Hassan, MD, PhD, FRCSC,<sup>9</sup> Jean-Francois Légaré, MD, FRCSC,<sup>10</sup>

8 Rakesh C. Arora, MD, PhD, FRCSC, FACS,<sup>†4</sup> and Todd A. Duhamel, PhD.<sup>†1,2</sup>

10 †Contributed equally as senior authors

11 §Corresponding author

13 **Affiliations**

14 <sup>1</sup>Health, Leisure & Human Performance Research Institute, Faculty of Kinesiology and Recreation  
15 Management, University of Manitoba, Winnipeg, Canada;

16 <sup>2</sup>Institute of Cardiovascular Sciences, St. Boniface Hospital Research Centre, Winnipeg, Canada;

17 <sup>3</sup>Seven Oaks Hospital Research Centre, Winnipeg, Canada;

18 <sup>4</sup>Department of Surgery, University of Manitoba and Cardiac Sciences Program, Winnipeg, Canada;

19 <sup>5</sup>Department of Community Health Sciences and Manitoba Centre for Health Policy, University of  
20 Manitoba, Winnipeg, Canada;

21 <sup>6</sup>College of Nursing, Faculty of Health Sciences, University of Manitoba Winnipeg, Canada;

22 <sup>7</sup>Seven Oaks Hospital Library, Winnipeg, Canada;

23 <sup>8</sup>Division of Cardiology, Department of Medicine, Dalhousie University, Halifax, Canada;

24 <sup>9</sup>Department of Cardiac Surgery, New Brunswick Heart Centre, Saint John Regional Hospital, Saint John,  
25 Canada;

26 <sup>10</sup>Division of Cardiac Surgery, Department of Surgery, Dalhousie University, Halifax, Canada;

**Running Head:** PA and post-cardiac surgical outcomes

2

1  
2  
3  
4  
5  
6  
7  
8  
9  
10  
11  
12  
13  
14  
15  
16  
17  
18  
19  
20  
21  
22  
23  
24  
25  
26  
27  
28  
29  
30  
31  
32  
33  
34  
35  
36  
37  
38  
39  
40  
41  
42  
43  
44  
45  
46  
47  
48  
49  
50  
51  
52  
53  
54  
55  
56  
57  
58  
59  
60

**Address for correspondence:**

1. Mr. Scott Kehler, 212 Active Living Centre, Winnipeg, MB, Canada, R3T 2N2

Telephone +1204 918 9131 Fax +1204 474 7634

e-mail: [skehler@sbrc.ca](mailto:skehler@sbrc.ca)

**Acknowledgements:**

Dr. Francesco Cacciatore and his research group provided additional data on ICU length of stay. TAD was supported by a Manitoba Health Research Council (MHRC) Establishment Grant. DSK was supported by an MHRC Studentship, A CIHR Frederick Banting and Charles Best Canada Graduate Scholarship, a CIHR Strategic Training Initiative in Health Research (STIHR) Knowledge Translation Canada Student Fellowship, a CIHR STIHR Population Intervention for Chronic Disease Prevention Fellowship and the Heart and Stroke Foundation Dr. Dexter Harvey Award. ANS was supported by a CIHR Canada Graduate Scholarship.

**Authors' Contributions:**

DSK was responsible for 1) analysis and interpretation of data, 2) drafting and revising the manuscript, and 3) consenting for manuscript submission. ANS, BH, NT, RF, ASH, NG, AH, JL were responsible for 1) analysis and interpretation of data, 2) revising the manuscript, and 3) consenting for manuscript submission. KM was responsible for 1) developing the systematic review literature search, 2) analysis and interpretation of data, 3) drafting and revising the manuscript, and 3) consenting for manuscript submission. RCA and TAD were responsible for 1) the conception and design, and analysis and interpretation of data, 2) revising the manuscript, and 3) consenting for manuscript submission RCA and TAD are co-senior authors.

**Funding:**

The work was supported by an Operating Grant from the Canadian Institutes of Health Research



**Running Head:** PA and post-cardiac surgical outcomes

53 grant number 326290.

54

**Ethics Approval:**

56 Not applicable

57

**Systematic review registration number:**

59 PROSPERO: CRD42015023606

60

**Competing Interests:**

62 The authors have no conflicts of interest to declare

63

**Data Sharing Statement:**

65 There are no additional unpublished data to share as a part of this systematic review.

66

67 Word count (not including abstract, tables, and references): 3990

68 Figures and tables: 5

69

70

**Running Head:** PA and post-cardiac surgical outcomes

4

1  
2  
3  
4  
5  
6  
7  
8  
9  
10  
11  
12  
13  
14  
15  
16  
17  
18  
19  
20  
21  
22  
23  
24  
25  
26  
27  
28  
29  
30  
31  
32  
33  
34  
35  
36  
37  
38  
39  
40  
41  
42  
43  
44  
45  
46  
47  
48  
49  
50  
51  
52  
53  
54  
55  
56  
57  
58  
59  
60

71 **ABSTRACT:**

72 **Objectives:** The objective of this systematic review was to study the impact of preoperative physical  
73 activity levels on adult cardiac surgical patients' postoperative: 1) major adverse cardiac and  
74 cerebrovascular events (MACCE), 2) adverse events within 30 days, 3) hospital length of stay (HLOS), 4)  
75 intensive care unit length of stay (ICU LOS), 5) activities of daily living (ADLs), 6) quality of life, 7)  
76 cardiac rehabilitation attendance, and 8) physical activity behavior.

77 **Methods:** A systematic search of MEDLINE, Embase, AgeLine, and Cochrane library for cohort studies  
78 was conducted.

79 **Results:** Eleven studies (n=5,733 patients) met the inclusion criteria. Only self-reported physical activity  
80 tools were used. Few studies used multivariate analyses to compare active versus inactive patients prior to  
81 surgery. When comparing patients who were active versus inactive preoperatively, there were mixed  
82 findings for MACCE, 30 day adverse events, HLOS, and ICU LOS. Of the studies which adjusted for  
83 confounding variables, five studies found a protective, independent association between physical activity  
84 and MACCE (n= 1), 30 day postoperative events (n= 2), hospital length of stay (n= 1), and ICU length of  
85 stay (n= 1), but two studies found no protective association for 30 day postoperative events (n= 1) and  
86 postoperative ADLs (n= 1). No studies investigated if activity status before surgery impacted quality of  
87 life or cardiac rehabilitation attendance postoperatively. Three studies found that active patients prior to  
88 surgery were more likely to be inactive postoperatively.

89 **Conclusion:** Due to the mixed findings, the literature does not presently support that self-reported  
90 preoperative physical activity behavior is associated with postoperative cardiac-surgical outcomes. Future  
91 studies should objectively measure physical activity, clearly define outcomes, and adjust for clinically  
92 relevant variables.

93 **Registration:** PROSPERO number CRD42015023606.

94  
95 **Keywords:** Cardiac Surgical Procedures, Exercise, Prognosis, Postoperative Complications  
96

**Running Head:** PA and post-cardiac surgical outcomes

1  
2  
3 97 **ARTICLE SUMMARY**

4  
5 98 **Strengths and limitations of this study**

6  
7  
8 99 - There were mixed findings regarding the impact of physical activity on post cardiac-surgical  
9  
10 100 outcomes.

11  
12 101 - Only self-reported physical activity tools were used.

13  
14 102 - The multiple tools to measure physical activity and the variety of definitions of outcomes did not  
15  
16 103 allow for a quantitative synthesis (meta-analysis).  
17  
18  
19  
20  
21  
22  
23  
24  
25  
26  
27  
28  
29  
30  
31  
32  
33  
34  
35  
36  
37  
38  
39  
40  
41  
42  
43  
44  
45  
46  
47  
48  
49  
50  
51  
52  
53  
54  
55  
56  
57  
58  
59  
60

1  
2  
3 104 **INTRODUCTION**  
4

5 105 Recent reports suggest that more than half of cardiac surgeries are being performed on older adults who  
6  
7 106 are more likely to be frail and have multiple co-morbidities.<sup>1</sup> While cardiac surgery has been shown to  
8  
9 107 improve the outcomes of these patients, more than 75% of major perioperative complications and deaths  
10  
11 108 occur in older adults.<sup>2,3</sup> Before surgery, many of these patients are de-conditioned and have diminished  
12  
13 109 resilience in the face of major stressors such as cardiac surgery, and it has been postulated that they could  
14  
15 110 benefit from a therapeutic intervention prior to their major surgical procedure in order to reduce their  
16  
17 111 operative risk. However, little information exists to evaluate the benefit of preoperative risk reduction  
18  
19 112 strategies for the older cardiac surgery patient.  
20  
21  
22

23 113  
24  
25 114 Adopting and sustaining a more physically active lifestyle is typically intended to be a part of an  
26  
27 115 interdisciplinary rehabilitation plan that is instituted postoperatively and has been shown to reduce the  
28  
29 116 risk of cardiac mortality and hospital admissions and improve health-related (QOL) in patients.<sup>4</sup>  
30  
31 117 Importantly, older adults who sustain a physically active lifestyle after a postoperatively exercise-based  
32  
33 118 rehabilitation program can continue to improve their functional walking status.<sup>5</sup> However, evidence  
34  
35 119 suggests that cardiac surgery patients are highly sedentary during the preoperative period, especially in  
36  
37 120 older adults.<sup>6</sup> Furthermore, few randomized controlled trials exist which evaluate the therapeutic benefit  
38  
39 121 of preoperative lifestyle modification in patients undergoing cardiac surgery.<sup>7-9</sup> Information regarding the  
40  
41 122 link between preoperative physical activity and postoperative health outcomes in cardiac surgery patients  
42  
43 123 would be valuable for healthcare providers to assist them in selecting patients who might benefit from  
44  
45 124 preoperative exercise therapy.  
46  
47  
48

49 125  
50  
51 126 The purpose of this systematic review was to compare the following postoperative outcomes between  
52  
53 127 cardiac surgery patients defined as physically active prior to surgery and those who were defined as  
54  
55 128 physically inactive preoperatively: 1) major adverse cerebrovascular and cardiovascular events (MACCE)  
56  
57 129 2) 30-day adverse events as defined by the Society of Thoracic Surgeons (STS)<sup>10</sup> 3) hospital length of  
58  
59  
60

**Running Head:** PA and post-cardiac surgical outcomes

1  
2  
3  
4  
5  
6  
7  
8  
9  
10  
11  
12  
13  
14  
15  
16  
17  
18  
19  
20  
21  
22  
23  
24  
25  
26  
27  
28  
29  
30  
31  
32  
33  
34  
35  
36  
37  
38  
39  
40  
41  
42  
43  
44  
45  
46  
47  
48  
49  
50  
51  
52  
53  
54  
55  
56  
57  
58  
59  
60

130 stay, 4) Intensive Care Unit (ICU) length of stay, 5) health-related QOL, 6) activities of daily living  
131 (ADL) 7) cardiac rehabilitation attendance and 8) physical activity levels postoperatively.  
132

For peer review only

Running Head: PA and post-cardiac surgical outcomes

8

1  
2  
3 133 **MATERIAL AND METHODS**  
4

5 134  
6

7 135 The protocol for this systematic review has been described in PROSPERO: CRD42015023606. Note  
8  
9 the following *ad-hoc* changes to the previous protocol: ICU length of stay and postoperative physical  
10 136  
11 activity as additional outcomes were explored in this systematic review.  
12 137  
13

14 138

15  
16 139 **Eligibility criteria**  
17

18 140  
19

20 141 Eligible studies included cohort studies which examined adult (>18 years) cardiac surgery patients  
21  
22 undergoing coronary artery bypass grafting (CABG), aortic or mitral valve repair/replacement,  
23 142  
24 transcatheter aortic valve implantation, or combined procedures. Studies with patients undergoing  
25 143  
26 congenital cardiac surgery, heart transplantation or left ventricular assist device implantation procedures  
27 144  
28 were excluded. Studies could compare physically active versus inactive patients prior to cardiac surgery  
29 145  
30 on the basis of subjective (e.g., questionnaire) or objective (e.g., pedometer, accelerometry) assessments  
31 146  
32 of physical activity.  
33 147  
34

35 148  
36

37 149 Eligible studies had to compare at least one of the following postoperative outcomes: MACCE defined  
38 150  
39 as death, stroke, myocardial infarction, and the need for emergency cardiac surgery; 30-day adverse  
40 151  
41 events as defined by the STS,<sup>10</sup> including an unexpected return to the operating room, complications due  
42 152  
43 to pulmonary, cardiovascular, gastrointestinal, hematological, urologic, infection, and neurological  
44 153  
45 deficits, other important miscellaneous outcomes (e.g., unexpected admission to ICU, or other events  
46 154  
47 requiring admission to operating room requiring anesthesia; hospital length of stay; ICU length of stay;  
48 155  
49 health-related QOL with any assessment tool; ADLs using any evaluation strategy; cardiac rehabilitation  
50 156  
51 attendance; and physical activity behavior using either subjective or objective forms of assessment.  
52 157  
53

54 158  
55  
56

57  
58  
59

60

**Running Head:** PA and post-cardiac surgical outcomes

1  
2  
3 159  
4  
5 160  
6  
7  
8 161

**Search strategy**

9  
10 162

11  
12 163

The search strategy was completed by a librarian and reviewed by a second librarian. The search

13  
14 164

included keywords and controlled vocabulary. English language limits were applied. Databases used

15  
16 165

included MEDLINE, Embase, AgeLine, and Cochrane Library (CDSR, CENTRAL, DARE) and articles

17  
18 166

were searched from inception to December 2016. The MEDLINE strategy was registered and published

19  
20 167

online in PROSPERO

21  
22 168

([http://www.crd.york.ac.uk/PROSPEROFILES/23606\\_STRATEGY\\_20150518.pdf](http://www.crd.york.ac.uk/PROSPEROFILES/23606_STRATEGY_20150518.pdf)) and is also available

23  
24 169

as a supplementary file. The search was validated through a cross-check of references of studies selected

25  
26 170

for inclusion. In addition, conference abstracts were hand searched using the Internet. Attempts were

27  
28 171

made to contact authors of conference abstracts to determine if their findings were published in a peer-

29  
30 172

reviewed journal.

31  
32 173

33  
34 174

35  
36 175

**Study selection**

37  
38 176

39  
40 177

The title, abstract and full-text article screening processes were independently completed by two

41  
42 178

reviewers. A training exercise for the title and abstract phase was conducted by the independent reviewers

43  
44 179

using a random sample of 100 titles and abstracts. Discrepancies in studies for inclusion were resolved by

45  
46 180

discussion of the two reviewers. The final observed agreement was 98% with a kappa statistic of 0.47 for

47  
48 181

the title and abstract screen. One training exercise of 10 randomly selected articles was completed for the

49  
50 182

full-text screen. Discrepancies for inclusion were resolved through discussion. The observed agreement

51  
52 183

for the full-text screen was 96% with a kappa statistic of 0.83.

53  
54 184

55  
56  
57  
58  
59  
60

Running Head: PA and post-cardiac surgical outcomes

10

1  
2  
3 185 **Data abstraction**  
4

5 186

6  
7 187 Two reviewers independently extracted relevant data for the selected outcomes described above.

8  
9  
10 188 Discrepancies in the data extraction procedure were resolved through discussion. Data abstraction items

11 189 included study characteristics (e.g., authors, year of publication, sample size, follow up time points if

12 190 relevant), patient characteristics (e.g., age, sex, surgery type), physical activity tool used, and the

13  
14  
15 191 outcomes which were measured.  
16  
17

18 192

19  
20 193 **Risk of bias assessment**  
21

22 194

23  
24  
25 195 Two reviewers independently reviewed the risk of bias of each included study using the Newcastle-

26 196 Ottawa Scale.<sup>11</sup> Items within this tool assess the risk of bias associated with selection of participants,

27 197 comparability (e.g., study authors controlled for patient demographics and clinical characteristics), and

28  
29 198 outcome assessment (e.g., data collection method for outcome, sufficient follow-up, and adequacy of

30  
31 199 follow up of cohorts). Each study was given a score within each category (Selection: 0-4; Comparability:

32 200 0-2; and Outcome: 0-3) and an overall score ranging from 0-9. A score of zero suggests an increased risk

33  
34 201 of bias and a higher score suggests a lower risk of bias.  
35  
36  
37  
38  
39

40 202

41  
42 203 **Quantitative synthesis**  
43

44 204

45  
46 205 Due to the significant heterogeneity between studies in terms of physical activity assessment tools used

47 206 and outcomes assessed, meta-analyses were not performed.  
48  
49  
50  
51  
52  
53  
54  
55  
56  
57  
58  
59  
60



1  
2  
3 207 **RESULTS**  
4

5 208

7 209 The literature search results are shown in Figure 1. After removing duplicates, 5722 articles were title  
8  
9 and abstract screened. A total of 137 articles were then assessed in full-text. Eleven studies met the  
10  
11 eligibility criteria for the final analysis, and they included a total of 5,733 patients.<sup>12-22</sup>  
12  
13

14 212

16 213 An overview of the included studies can be viewed in Table 1. In the studies by Markou et al.,<sup>12,14</sup> Nery  
17  
18 et al.,<sup>13,16</sup> Martini et al.,<sup>15</sup> they evaluated CABG only patients. Rengo et al.,<sup>17</sup> Giaccardi et al.,<sup>18</sup>  
19  
20 215 Cacciatore et al.,<sup>19</sup> Noyez et al.,<sup>20</sup> and Min et al.<sup>21</sup> evaluated both CABG and/or valve procedures, and van  
21  
22 Laar et al.<sup>22</sup> evaluated isolated aortic valve repair patients. The average age of participants in different  
23  
24 studies ranged from 60 years (Martini and Nery et al.<sup>15,16</sup>) to 75 years (Rengo, Giaccardi, Min, and van  
25  
26 Laar et al.<sup>17,18,21,22</sup>). Rengo et al.,<sup>17</sup> Giaccardi et al.,<sup>18</sup> Min et al.,<sup>21</sup> and van Laar et al.<sup>22</sup> excluded patients  
27  
28 with physical impairments or with New York Heart Association heart failure class IV symptoms (severe  
29  
30 cardiac symptoms) but in general exclusion criteria were not explicitly reported. Studies were conducted  
31  
32 in the Netherlands (Markou et al.,<sup>12,14</sup> Noyez et al.,<sup>20</sup> and van Laar et al.<sup>22</sup>), Brazil (Nery et al.,<sup>13,16</sup> and  
33  
34 Martini et al.<sup>15</sup>), Italy (Rengo et al.,<sup>17</sup> Giaccardi et al.,<sup>18</sup> and Cacciatore et al.<sup>19</sup>), and the United States (Min  
35  
36 et al.<sup>21</sup>). Two studies by Nery et al.<sup>13</sup> and Martini et al.<sup>15</sup> used the same patient sample, but examined  
37  
38 different outcomes. The sample size of studies ranged from 35 in the Min et al.<sup>21</sup> study to 3150 in the  
39  
40 Noyez et al.<sup>20</sup> study  
41  
42  
43  
44

45 226

46 227 **Physical activity tools**  
47

48 228

50  
51 229 The physical activity assessments in each study were based on self-reported assessment tools. The  
52  
53 timing of the physical activity assessments prior to surgery was not reported by Cacciatore et al.,<sup>19</sup> Nery et  
54  
55 al.,<sup>13,16</sup> Markou et al.,<sup>12,14</sup> or by Martini et al.<sup>15</sup> Rengo et al.<sup>17</sup> reported the timing of their physical activity  
56  
57 assessment, which was within 35±6 days prior to surgery. Noyez et al., and van Laar et al. measured  
58  
59  
60

**Running Head:** PA and post-cardiac surgical outcomes

12

1  
2  
3 233 activity the day before surgery.<sup>20,22</sup> Min and colleagues measured physical activity four weeks prior to the  
4  
5 234 patients' surgical procedure.<sup>21</sup> Finally, Giaccardi et al. measured preoperative physical activity levels  
6  
7 235 approximately one week following surgery.<sup>18</sup>  
8  
9

10 236

11 237 Four studies used the Corpus Christi Heart Project questionnaire<sup>12,14,20,22</sup> which asks participants about  
12  
13  
14 238 their typical physical activity behaviors over the past year during their leisure time. Participants were  
15  
16 239 categorized into a sedentary group if they accumulated less than 30 minutes per day of light intensity  
17  
18 240 activity, or into an active group if they accumulated at least one session per week of dynamic activity  
19  
20 241 lasting  $\geq 15$  minutes marked by moderate intensity. Nery et al.,<sup>13,16</sup> and Martini et al.<sup>15</sup> used a structured  
21  
22 242 questionnaire confirmed by the Minnesota Leisure Time Physical Activity Questionnaire<sup>13</sup> or the Baecke  
23  
24 243 Usual Physical Activity questionnaire.<sup>15,16</sup> Both physical activity tools ask participants to recall their  
25  
26 244 usual activities 12 months prior and determine the frequency, intensity, and time of activity. Participants  
27  
28 245 were categorized into an inactive group if they engaged only in light intensity ( $< 3$  metabolic equivalents)  
29  
30 246 activity or into an active group if they achieved  $\geq 3$  metabolic equivalents. Rengo et al.<sup>17</sup> and Cacciatore et  
31  
32 247 al.<sup>19</sup> used the Physical Activity Scale for the Elderly, which is a 7-day recall of a participants' frequency,  
33  
34 248 intensity, duration, and type of activity. Participants receive a total score from 0-400. Rengo et al.<sup>17</sup>  
35  
36 249 separated participants by inactive and active groups using the median score, whereas Cacciatore et al.<sup>19</sup>  
37  
38 250 used the continuous measure. The Harvard Alumni Questionnaire was implemented by Giaccardi and  
39  
40 251 colleagues<sup>18</sup> which measures the typical weekly amount and intensity of physical activity over the past  
41  
42 252 year. Participants were categorized as inactive if they participated in  $< 1$  hour per week of light activity  
43  
44 253 and as active if they participated in either  $\geq 4$  hours of light or more than 1-2 hours of moderate activity  
45  
46 254 per week. In the study by Min et al.,<sup>21</sup> the physical activity-related questions were used from the Health  
47  
48 255 and Retirement Survey, which determines a participants' frequency and intensity of activity in a typical  
49  
50 256 week. These authors used the continuous score in their study.  
51  
52  
53  
54  
55  
56  
57  
58  
59  
60

257

258 **MACCE**

**Running Head:** PA and post-cardiac surgical outcomes

259  
260 Outcomes within the definition of MACCE were evaluated in four studies (Table 2) by Nery et al.,<sup>13</sup>  
261 Martini et al.,<sup>15</sup> Rengo et al.,<sup>17</sup> and van Laar et al.<sup>22</sup> The follow-up periods were one (Nery et al.<sup>13</sup>) two  
262 (Martini et al.,<sup>15</sup> and van Laar et al.<sup>22</sup>) and five years (Rengo et al.<sup>17</sup>) postoperatively. Unadjusted  
263 differences between active versus inactive patients and MACCE (defined as atrial fibrillation, hospital  
264 admission, reoperation and MI) were found one-year postoperatively in the Nery et al.<sup>13</sup> study. The  
265 Martini et al.<sup>15</sup> study found no differences (defined as mortality, re-hospitalization, cerebrovascular  
266 accident and MI) at two years postoperatively. The unadjusted rates of mortality within two years post-  
267 surgery was significantly higher in the active versus inactive group were found in the study by van Laar  
268 and colleagues<sup>22</sup>. The study by Rengo and associates found a significant and dose-response relationship  
269 between physical activity and postoperative cardiac and all-cause mortality after controlling for  
270 preoperative demographics, medical history, medications, and clinical characteristics.<sup>17</sup>

271

### 272 **30-day events**

273

274 Five studies (Markou et al.,<sup>12</sup> Nery et al.,<sup>16</sup> Rengo et al.,<sup>17</sup> Giaccardi et al.,<sup>18</sup> and Noyez et al.<sup>20</sup>)  
275 evaluated postoperative events within 30 days of surgery (Table 2). The postoperative events measured  
276 varied significantly between the studies. Three studies (Nery et al.,<sup>16</sup> Giaccardi et al.,<sup>18</sup> and Noyez et al.<sup>20</sup>)  
277 examined if physical activity was an independent protective factor against postoperative events. Physical  
278 activity was an independent protective factor against the combined outcome of mortality, MI, and  
279 reoperation in the study by Nery et al.,<sup>16</sup> as well as postoperative atrial fibrillation in the Giaccardi and  
280 associates study,<sup>18</sup> but was not significant for in-hospital or 30-day mortality in the Noyez et al.<sup>20</sup> study.

281

### 282 **Postoperative health-related QOL**

283

284 No studies evaluated postoperative health-related QOL.

Running Head: PA and post-cardiac surgical outcomes

14

1  
2  
3 285  
4  
5 286  
6  
7  
8 287

### **Hospital and ICU length of stay**

9  
10 288

11  
12 289 Three studies by Markou et al.<sup>12</sup> and Nery et al.<sup>13,16</sup> compared hospital length of stay between active vs.  
13  
14 290 inactive cardiac surgery patients (Table 3). Hospital length of stay was longer in the inactive group in two  
15  
16 291 of three studies (both by Nery et al.<sup>13,16</sup>). One of the studies by Nery et al.<sup>16</sup> did not report hospital length  
17  
18 292 of stay summary statistics between the active vs. inactive groups. However that study reported an  
19  
20 293 independent association between the preoperative active vs. inactive group and a reduced likelihood of  
21  
22 294 prolonged hospital length of stay, though “prolonged” was not defined in the study.  
23  
24  
25 295

26  
27 296

28  
29 297 Three studies compared ICU length of stay between the preoperative physical activity groups (Table 3)  
30  
31 298 (Markou et al.<sup>12</sup>, Cacciatore et al.<sup>19</sup> and Noyez et al.<sup>20</sup>). Two studies (Markou et al.<sup>12</sup> and Noyez et al.<sup>20</sup>)  
32  
33 299 found that the inactive group had a significantly longer ICU length of stay compared to the active group.  
34  
35 300 In the study by Cacciatore and colleagues, they found in their multivariate analysis that the active group  
36  
37 301 was less likely to have a prolonged ICU length of stay >3 days compared to the inactive group after  
38  
39 302 controlling for age, off-pump CABG, stroke, and renal failure.  
40  
41

42 303

### **Postoperative ADLs**

43  
44 304  
45  
46 305

47 306 One study by Min et al.<sup>19</sup> examined the impact of preoperative physical activity and postoperative  
48  
49 307 ADLs at the time of hospital discharge and revealed no statistically significant ( $p=0.079$ ) association  
50  
51 308 between the two after adjusting for preoperative demographics and clinical variables.  
52

53  
54 309

### **Cardiac rehabilitation attendance**

55  
56 310  
57  
58  
59  
60

**Running Head:** PA and post-cardiac surgical outcomes

311 No studies evaluated cardiac rehabilitation attendance postoperatively.

312

313

314 **Postoperative physical activity behavior**

315

316 The impact of preoperative physical activity on postoperative physical activity levels was examined in  
317 the two studies by Markou et al.<sup>12,14</sup> and in the other study by Min et al.<sup>21</sup>(Table 3).These studies found  
318 that the active group preoperatively was more likely to be physically inactive postoperatively. In both of  
319 the Markou et al. <sup>12,14</sup> studies, they completed a multivariate analyses and found that this association  
320 remained statistically significant after controlling for age, gender, and preoperative clinical  
321 characteristics.

322

323 **Risk of bias**

324

325 The risk of bias assessment via the Newcastle-Ottawa Scale can be viewed in Table 4. Since some  
326 studies assessed multiple outcomes, the risk of bias assessments were based on their highest possible  
327 score (e.g., some outcomes were assessed with a multivariable analysis, while others were not in the same  
328 study). All studies scored at least 3 out of 4 for the selection of study groups. There was variability across  
329 studies for the ascertainment of exposure or outcome of interest. Total risk of bias scores ranged from 5 to  
330 9, suggesting the studies were of moderate to high quality, respectively.

1  
2  
3 331 **DISCUSSION**  
4

5 332 The purpose of this systematic review was to determine if physical activity before cardiac surgery was  
6  
7 333 associated with postoperative health outcomes. Given the different self-reported physical activity tools  
8  
9 334 used that prevented comparison across studies, the inconsistent use of adjustment for potential  
10  
11 335 confounders, and the varying outcomes evaluated for MACCE and 30 day postoperative events, it cannot  
12  
13 336 be concluded that preoperative physical activity is associated with postoperative outcomes in adult  
14  
15 337 cardiac surgery patients. This systematic review highlights important gaps within the literature on this  
16  
17 338 topic. Therefore, key recommendations for examining the impact of preoperative physical activity  
18  
19 339 behavior on post-surgical outcomes of cardiac patients are provided (Box 1).  
20  
21  
22  
23

24  
25 341 The different self-reported physical activity tools used across the studies makes it difficult to compare  
26  
27 342 the preoperative physical activity levels of patients prior to cardiac surgery. Even so, it is important to  
28  
29 343 note that in the studies included in this systematic review, most of the studies identified a sub-sample of  
30  
31 344 cardiac surgery patients who were more vulnerable to poor health outcomes by categorizing patients as  
32  
33 345 active or inactive prior to surgery using their self-reported physical activity measures. However, the way  
34  
35 346 the physical activity tools measured physical activity (e.g., over the past year or in the past week; see the  
36  
37 347 Methods section) could have influenced the outcomes of the study. There seems to be no universally  
38  
39 348 accepted tool to measure self-reported physical activity levels,<sup>23</sup> and it is unclear if any of the physical  
40  
41 349 activity tools identified by this review have been validated in the cardiac surgery patient. One advantage  
42  
43 350 of using self-reported physical activity measures in studies is their ease of administration compared to  
44  
45 351 other objectively measured physical activity tools. Furthermore, self-reported physical activity tools  
46  
47 352 appear to provide some value when assessing the independent association between activity levels and  
48  
49 353 poor outcomes. In fact, most physical activity guideline recommendations for health benefits, including  
50  
51 354 those in North America, are based on self-reported measures.<sup>24,25</sup> Another strength of using a subjective  
52  
53 355 physical activity tool in the preoperative cardiac surgery patient is that it would capture a patient's  
54  
55 356 physical activity behavior before they are placed on a waiting list, when they might refrain from being  
56  
57  
58  
59  
60

**Running Head:** PA and post-cardiac surgical outcomes

1  
2  
3 357 physically active in fear of making their condition worse. However, cardiac surgery patients and other  
4  
5 358 patient populations tend to misreport their physical activity levels compared to objectively measured  
6  
7 359 physical activity.<sup>6,26</sup> Nevertheless, this systematic review found no studies that evaluated objectively  
8  
9  
10 360 measured physical activity before cardiac surgery and its link to postoperative health outcomes. Evidence  
11  
12 361 suggests there is a stronger association between objective measures of physical activity and various  
13  
14 362 cardiovascular and metabolic biomarkers as compared to subjective measures of physical activity.<sup>27,28</sup>  
15  
16 363 While it is unclear which objective measures of physical activity are most appropriate in the complex  
17  
18 364 cardiac surgical patients, future studies should use a physical activity tools such as accelerometers or  
19  
20  
21 365 pedometers.

22  
23 366  
24  
25 367 There were inconsistent findings across studies assessing the same outcomes, and many studies did not  
26  
27 368 adjust for clinically relevant variables that could influence the health outcomes of cardiac surgery  
28  
29 369 patients. It is possible that most of the included studies were not statistically powered to detect changes  
30  
31 370 between inactive and active groups. The study by Rengo et al.<sup>17</sup> had the largest sample size of the four  
32  
33 371 studies that assessed MACCE outcomes, which found a significant protective association between  
34  
35 372 preoperative physical activity and cardiac and all-cause mortality five years postoperatively after  
36  
37 373 controlling for clinically relevant variables (Table 2). In contrast, the largest study examined in this  
38  
39 374 systematic review by Noyez and colleagues<sup>20</sup> found no association between preoperative activity and  
40  
41 375 hospital and 30-day mortality after controlling for covariates (Table 2). It is difficult to determine if  
42  
43 376 patient-level factors influence outcomes (e.g., elective or acute patients, surgery type, older versus  
44  
45 377 younger, females vs. males) as the samples were somewhat heterogeneous. Even so, some of the results of  
46  
47 378 this systematic review are promising. Specifically, of the studies which controlled for confounding  
48  
49 379 variables, five studies found a protective, independent association, between higher preoperative physical  
50  
51 380 activity levels when assessing clinical outcomes, including MACCE,<sup>17</sup> 30 day postoperative events,<sup>16,18</sup>  
52  
53 381 hospital length of stay,<sup>16</sup> and ICU length of stay;<sup>19</sup> whereas, only two studies found no protective  
54  
55 382 association for 30 day postoperative events<sup>20</sup> and postoperative ADLs.<sup>19</sup> Yet, more studies are needed to  
56  
57  
58  
59  
60

**Running Head:** PA and post-cardiac surgical outcomes

18

1  
2  
3 383 elucidate the impact of preoperative physical activity on post-cardiac surgical outcomes that control for  
4  
5 384 clinically relevant variables. Clinical variables included in the cardiac surgical risk models (e.g.,  
6  
7 385 EuroSCORE, STS score) could attenuate or mitigate the relationship between preoperative physical  
8  
9 386 activity behavior and postoperative outcomes. Collectively, future studies are needed to determine if  
10  
11 387 preoperative physical activity is a protective factor for health outcomes after cardiac surgery which  
12  
13 388 control for clinically relevant variables known to impact cardiac surgery outcomes.  
14  
15  
16 389

17  
18 390 An unanticipated finding was that patients who were active before surgery had a higher likelihood of  
19  
20 391 being physically inactive postoperatively, after controlling for co-morbidities.<sup>12,14,21</sup> Healthcare providers  
21  
22 392 may have advised patients with more severe symptomology prior to surgery to refrain from physical  
23  
24 393 activity. Also, the relief of cardiac symptoms after surgery among inactive patients could have led them to  
25  
26 394 become more active postoperatively. However, these possibilities were not explored in the included  
27  
28 395 studies.  
29  
30  
31 396

32  
33 397 While outside the scope of this systematic review, future studies should investigate if changes to  
34  
35 398 physical activity levels prior to cardiac surgery impact long-term patient health-outcomes. Cardiac  
36  
37 399 rehabilitation programs are intended to support cardiac patients in becoming more physically active  
38  
39 400 postoperatively and it has been shown that patients who attend such programs reduce their risk for  
40  
41 401 cardiac-related mortality and hospitalization rates.<sup>29</sup> Evidence suggests that among those referred to  
42  
43 402 cardiac rehabilitation after cardiac surgery, only 40% attend.<sup>6</sup> However, the literature is less clear on  
44  
45 403 whether patients who attend cardiac rehabilitation are more physically active compared to those who do  
46  
47 404 not attend. It is possible that patients who adopt and sustain a more physically active lifestyle on their  
48  
49 405 own after cardiac surgery could yield similar health benefits compared to those who attend an exercise-  
50  
51 406 based rehabilitation program, but this hypothesis requires further investigation.  
52  
53  
54  
55 407



**Running Head:** PA and post-cardiac surgical outcomes

1  
2  
3 408 Previous randomized controlled trials comparing an exercise program to standard care prior to elective  
4  
5 409 cardiac surgery (i.e., “Prehab”) demonstrate reductions in hospital length of stay and improvements in  
6  
7 410 walking ability postoperatively.<sup>7-9</sup> However, there were mixed findings from this systematic review when  
8  
9  
10 411 comparing preoperative physical activity behavior and hospital stay.<sup>12,16</sup> These divergent findings suggest  
11  
12 412 either that a medically supervised and individualized physical activity program is needed to derive the  
13  
14 413 health benefits of physical activity prior to cardiac surgery, or that patients are misreporting their physical  
15  
16 414 activity behaviors. Future cohort studies in this area should address the drawbacks of the included studies  
17  
18 415 in this systematic review included in Box 1, while randomized trials should focus on whether preoperative  
19  
20 416 exercise therapy programs are feasible and efficacious in clinical practice.  
21

22  
23 417  
24  
25 418 The findings of this systematic review suggest that the literature would benefit from standardization of  
26  
27 419 the definition of measures such as MACCE and postoperative events within 30 days. The heterogeneity in  
28  
29 420 reporting of outcomes can lead to considerably different conclusions across studies.<sup>30</sup> Attempts should  
30  
31 421 also be made to ensure other clinically important outcomes are captured, such as the addition of 30-day  
32  
33 422 events. Only one study in this review compared physically active versus inactive patients preoperatively  
34  
35 423 and reported on the individual postoperative events within 30 days.<sup>20</sup> Collectively, uniform outcome  
36  
37 424 reporting and appropriate outcome definitions are recommended when examining the outcomes of cardiac  
38  
39 425 surgery.<sup>30</sup>  
40  
41  
42 426

43  
44 427 Patient-oriented outcomes should also be captured to ensure that cardiac surgery is improving other  
45  
46 428 outcomes that patients value. No studies in this review determined if there was a link between  
47  
48 429 preoperative physical activity behavior and postoperative health-related QOL, and only one study  
49  
50 430 evaluated postoperative ADLs.<sup>19</sup> QOL postoperatively tends to improve in some older patients, while  
51  
52 431 others tend to decline.<sup>31</sup> Importantly, the preoperatively physical activity and overall functional status of  
53  
54 432 cardiac surgery patients could play a role in the postoperative trajectory of these outcomes such as QOL.  
55  
56  
57  
58  
59  
60

**Running Head:** PA and post-cardiac surgical outcomes

20

1  
2  
3 433 Other patient-oriented outcomes, including postoperative pain and cardiac symptoms, could also be  
4  
5 434 investigated.  
6  
7  
8 435

9  
10 436 If physical activity is to be assessed in the preoperative period, the extent of missing data may also be a  
11  
12 437 concern, especially with objective physical activity measures. The possibility of missing data from  
13  
14 438 individual studies included in this systematic review was outside the objectives of the present study, but is  
15  
16 439 a salient point that should be considered for future investigations. It is also important to understand  
17  
18 440 patient-level factors associated with missing data. The use of statistical techniques that address missing  
19  
20 441 data, such as multiple imputation, is one approach to address missing physical activity data. Importantly,  
21  
22 442 it has been shown that multiple imputation leads to precise estimates of predicting 30-day mortality risk  
23  
24 443 in cardiac surgery patients when important clinical variables are missing, as compared to estimating risk  
25  
26 444 with a complete case analysis.<sup>32</sup>  
27  
28  
29 445

### 30 31 446 **Limitations**

32  
33 447 One limitation to consider is that the patients included across the studies evaluated in this systematic  
34  
35 448 review may have been different, as the recruitment criteria were not always clearly stated. A small sample  
36  
37 449 of studies explicitly stated that they excluded those with physical limitations and healthcare providers  
38  
39 450 may have advised higher risk patients to not participate in physical activity. There is also a limitation  
40  
41 451 associated with the methodology of this systematic review: only studies written in English were included,  
42  
43 452 raising the possibility that some studies were missed.  
44  
45  
46 453

### 47 48 49 454 **Conclusion**

50  
51 455 Due to the mixed findings in this systematic review, it cannot be concluded that self-reported physical  
52  
53 456 activity behavior before cardiac surgery is associated with health outcomes after surgery. The mixed  
54  
55 457 findings could be due to the heterogeneity in physical activity tools used, definitions of outcomes, and the  
56  
57  
58  
59  
60

**Running Head:** PA and post-cardiac surgical outcomes

1  
2  
3  
4  
5  
6  
7  
8  
9  
10  
11  
12  
13  
14  
15  
16  
17  
18  
19  
20  
21  
22  
23  
24  
25  
26  
27  
28  
29  
30  
31  
32  
33  
34  
35  
36  
37  
38  
39  
40  
41  
42  
43  
44  
45  
46  
47  
48  
49  
50  
51  
52  
53  
54  
55  
56  
57  
58  
59  
60

458 few studies adjusting for other potentially confounding variables. These findings highlight the need for  
459 more research in this area.

For peer review only

460 **REFERENCES**

- 461 1. Ferguson TB, Hammill BG, Peterson ED, DeLong ER, Grover FL, STS National Database  
462 Committee. A decade of change--risk profiles and outcomes for isolated coronary artery bypass  
463 grafting procedures, 1990-1999: a report from the STS National Database Committee and the Duke  
464 Clinical Research Institute. Society of Thoracic Surgeons. *Ann Thorac Surg.* 2002;73(2):480-489-  
465 490.
- 466 2. Pfisterer M, Buser P, Osswald S, et al. Outcome of elderly patients with chronic symptomatic  
467 coronary artery disease with an invasive vs optimized medical treatment strategy: one-year results  
468 of the randomized TIME trial. *JAMA.* 2003;289(9):1117-1123.
- 469 3. Alexander KP, Anstrom KJ, Muhlbaier LH, et al. Outcomes of cardiac surgery in patients > or = 80  
470 years: results from the National Cardiovascular Network. *J Am Coll Cardiol.* 2000;35(3):731-738.
- 471 4. Anderson L, Oldridge N, Thompson DR, et al. Exercise-Based Cardiac Rehabilitation for Coronary  
472 Heart Disease: Cochrane Systematic Review and Meta-Analysis. *J Am Coll Cardiol.* 2016;67(1):1-  
473 12. doi:10.1016/j.jacc.2015.10.044.
- 474 5. Macchi C, Polcaro P, Cecchi F, et al. One-year adherence to exercise in elderly patients receiving  
475 postacute inpatient rehabilitation after cardiac surgery. *Am J Phys Med Rehabil Assoc Acad*  
476 *Physiatr.* 2009;88(9):727-734.
- 477 6. Horne D, Kehler DS, Kaoukis G, et al. Impact of Physical Activity on Depression After  
478 CardiacSurgery. *Can J Cardiol.* 2013;29(12):1649-1656.
- 479 7. Arthur HM, Daniels C, McKelvie R, Hirsh J, Rush B. Effect of a preoperative intervention on  
480 preoperative and postoperative outcomes in low-risk patients awaiting elective coronary artery  
481 bypass graft surgery. A randomized, controlled trial. *Ann Intern Med.* 2000;133(4):253-262.
- 482 8. Sawatzky JV, Kehler DS, Ready AE, et al. Prehabilitation program for elective coronary artery  
483 bypass graft surgery patients: a pilot randomized controlled study. *Clin Rehabil.* 2013;In press.
- 484 9. Herdy AH, Marcelli PL, Vila A, et al. Pre- and postoperative cardiopulmonary rehabilitation in  
485 hospitalized patients undergoing coronary artery bypass surgery: a randomized controlled trial. *Am J*

- 1  
2  
3 486 *Phys Med Rehabil Assoc Acad Physiatr.* 2008;87(9):714-719.  
4  
5 487 doi:10.1097/PHM.0b013e3181839152.  
6  
7  
8 488 10. Society of Thoracic Surgeons. General Thoracic Surgery Database. [http://www.sts.org/sts-national-](http://www.sts.org/sts-national-database/database-managers/general-thoracic-surgery-database)  
9  
10 489 [database/database-managers/general-thoracic-surgery-database](http://www.sts.org/sts-national-database/database-managers/general-thoracic-surgery-database). Accessed February 17, 2015.  
11  
12 490 11. Wells GA, Shea B, O'Connell D, et al. The Newcastle-Ottawa Scale (NOS) for assessing the quality  
13  
14 491 of nonrandomised studies in meta-analyses.  
15  
16 492 [http://www.ohri.ca/programs/clinical\\_epidemiology/oxford.asp](http://www.ohri.ca/programs/clinical_epidemiology/oxford.asp). Published 2011. Accessed January  
17  
18 493 25, 2015.  
19  
20 494 12. Markou AL, Lasten PJ, Noyez L. Physical activity post myocardial revascularization. Will surgery  
21  
22 495 improve my mobility?. *J Cardiovasc Surg (Torino)*. 2007;48(2):201-206.  
23  
24 496 13. Nery RM, Barbisan JN, Mahmud MI. Influence of the practice physical activity in the coronary  
25  
26 497 artery bypass graft surgery results. *Braz J Cardiovasc Surg*. 2007;22(3):297-302.  
27  
28 498 14. Markou AL, Evers M, van Swieten HA, Noyez L. Gender and physical activity one year after  
29  
30 499 myocardial revascularization for stable angina. *Interact Cardiovasc Thorac Surg*. 2008;7(1):96-100.  
31  
32 500 15. Martini MR, Barbisan JN. Influence of physical activity during leisure time in patients in the  
33  
34 501 follow-up two years after CABG. *Rev Bras Cir Cardiovasc Orgao Of Soc Bras Cir Cardiovasc*.  
35  
36 502 2010;25(3):359-364.  
37  
38 503 16. Nery RM, Barbisan JN. Effect of leisure-time physical activity on the prognosis of coronary artery  
39  
40 504 bypass graft surgery. *Rev Bras Cir Cardiovasc Orgao Of Soc Bras Cir Cardiovasc*. 2010;25(1):73-  
41  
42 505 78.  
43  
44 506 17. Rengo G, Galasso G, Vitale DF, et al. An active lifestyle prior to coronary surgery is associated  
45  
46 507 with improved survival in elderly patients. *J Gerontol A Biol Sci Med Sci*. 2010;65(7):758-763.  
47  
48 508 doi:10.1093/gerona/glp216.  
49  
50 509 18. Giaccardi M, MacChi C, Colella A, et al. Postacute rehabilitation after coronary surgery: The effect  
51  
52 510 of preoperative physical activity on the incidence of paroxysmal atrial fibrillation. *Am J Phys Med*  
53  
54 511 *Rehabil*. 2011;90(4):308-315.  
55  
56  
57  
58  
59  
60

- 1  
2  
3 512 19. Cacciatore F, Anello CB, Ferrara N, et al. Determinants of prolonged intensive care unit stay after  
4  
5 513 cardiac surgery in the elderly. *Aging Clin Exp Res*. 2012;24(6):627-634.  
6  
7 514 20. Noyez L, Biemans I, Verkroost M, van Swieten H. Is a sedentary lifestyle an independent predictor  
8  
9 515 for hospital and early mortality after elective cardiac surgery?. *Neth Heart J*. 2013;21(10):439-445.  
10  
11 516 21. Min L, Mazzurco L, Gure TR, et al. Longitudinal functional recovery after geriatric cardiac surgery.  
12  
13 517 *J Surg Res*. 2015;194(1):25-33.  
14  
15 518 22. van Laar C, Kievit PC, Noyez L. Surgical aortic valve replacement in patients older than 75 years:  
16  
17 519 is there really a quality of life benefit?. *Neth Heart J*. 2015;23(3):174-179.  
18  
19 520 23. van Poppel MN, Chinapaw MJ, Mokkink LB, van Mechelen W, Terwee CB. Physical activity  
20  
21 521 questionnaires for adults: a systematic review of measurement properties. *Sports Med Auckl NZ*.  
22  
23 522 2010;40(7):565-600. doi:10.2165/11531930-000000000-00000;  
24  
25 523 24. Tremblay MS, Warburton DER, Janssen I, et al. New Canadian physical activity guidelines. *Appl*  
26  
27 524 *Physiol Nutr Metab Physiol Appliquée Nutr Métabolisme*. 2011;36(1):36-46-58. doi:10.1139/H11-  
28  
29 525 009.  
30  
31 526 25. Physical Activity Guidelines Advisory Committee. *Physical Activity Guidelines Advisory*  
32  
33 527 *Committee Report*. Washington, DC: U.S.: Department of Health and Human Services; 2008.  
34  
35 528 26. Lee PH, Macfarlane DJ, Lam TH, Stewart SM. Validity of the International Physical Activity  
36  
37 529 Questionnaire Short Form (IPAQ-SF): a systematic review. *Int J Behav Nutr Phys Act*. 2011;8.  
38  
39 530 doi:10.1186/1479-5868-8-115.  
40  
41 531 27. Schmidt MD, Cleland VJ, Thomson RJ, Dwyer T, Venn AJ. A comparison of subjective and  
42  
43 532 objective measures of physical activity and fitness in identifying associations with cardiometabolic  
44  
45 533 risk factors. *Ann Epidemiol*. 2008;18(5):378-386. doi:10.1016/j.annepidem.2008.01.005.  
46  
47 534 28. Atienza AA, Moser RP, Perna F, et al. Self-reported and objectively measured activity related to  
48  
49 535 biomarkers using NHANES. *Med Sci Sports Exerc*. 2011;43(5):815-821.  
50  
51 536 doi:10.1249/MSS.0b013e3181fdcf32.  
52  
53  
54  
55  
56  
57  
58  
59  
60

- 1  
2  
3 537 29. Anderson L, Thompson DR, Oldridge N, et al. Exercise-based cardiac rehabilitation for coronary  
4  
5 538 heart disease. *Cochrane Database Syst Rev*. 2016;1:CD001800.  
6  
7 539 doi:10.1002/14651858.CD001800.pub3.  
8  
9  
10 540 30. Goldfarb M, Drudi L, Almohammadi M, et al. Outcome Reporting in Cardiac Surgery Trials:  
11  
12 541 Systematic Review and Critical Appraisal. *J Am Heart Assoc*. 2015;4(8):e002204.  
13  
14 542 doi:10.1161/JAHA.115.002204.  
15  
16 543 31. Abah U, Dunne M, Cook A, et al. Does quality of life improve in octogenarians following cardiac  
17  
18 544 surgery? A systematic review. *BMJ Open*. 2015;5(4):e006904. doi:10.1136/bmjopen-2014-006904.  
19  
20 545 32. Karim MN, Reid CM, Tran L, Cochrane A, Billah B. Missing Value Imputation Improves Mortality  
21  
22 546 Risk Prediction Following Cardiac Surgery: An Investigation of an Australian Patient Cohort. *Heart*  
23  
24 547 *Lung Circ*. 2017;26(3):301-308. doi:10.1016/j.hlc.2016.06.1214.  
25  
26  
27 548

Running Head: PA and post-cardiac surgical outcomes

26

1  
2  
3 **FIGURE LEGENDS**  
4

5 **Figure 1.** Study flow diagram.  
6  
7  
8  
9  
10  
11  
12  
13  
14  
15  
16  
17  
18  
19  
20  
21  
22  
23  
24  
25  
26  
27  
28  
29  
30  
31  
32  
33  
34  
35  
36  
37  
38  
39  
40  
41  
42  
43  
44  
45  
46  
47  
48  
49  
50  
51  
52  
53  
54  
55  
56  
57  
58  
59  
60

For peer review only



Table 1. Characteristics of included studies.

| First author, year            | Study Population                                                                                                          | Country     | Participants at follow-up | Physical Activity Assessment                                                                 | Longest follow-up          | Main findings                                                                                                                                                                                                                               |
|-------------------------------|---------------------------------------------------------------------------------------------------------------------------|-------------|---------------------------|----------------------------------------------------------------------------------------------|----------------------------|---------------------------------------------------------------------------------------------------------------------------------------------------------------------------------------------------------------------------------------------|
| Giaccardi, 2011 <sup>18</sup> | All patients $\geq 65$ years undergoing CABG and/or valve procedures (total sample: $74.1 \pm 5.8$ years old); 43% female | Italy       | 158                       | Harvard Alumni Questionnaire                                                                 | Four weeks postoperatively | Physical activity had an independent association with postoperative atrial fibrillation within 30 days.                                                                                                                                     |
| Markou, 2007 <sup>12</sup>    | Elective CABG patients (Active: $64.4 \pm 9.4$ , Inactive: $63.8 \pm 9.0$ years old); % female not reported               | Netherlands | 428                       | The Corpus Christi Heart Project                                                             | One year                   | Inactive vs. Active group had significantly more peri-operative MIs, but not reoperations, ICU LOS, HLOS, or postoperative complications at one year. Inactive group was more likely than Active group to be physically active at one year. |
| Nery, 2007 <sup>13</sup>      | All patients undergoing CABG (Active: $63 \pm 11$ , Inactive $66 \pm 14$ years old); 42% female                           | Brazil      | 55                        | Structured Questionnaire confirmed by Minnesota Leisure Time Physical Activity Questionnaire | One year                   | Inactive vs. Active group had significantly longer HLOS and more postoperative events at one year.                                                                                                                                          |
| Markou, 2008 <sup>14</sup>    | Elective CABG patients ( $64.3 \pm 9.04$ years old); 18% female                                                           | Netherlands | 568                       | The Corpus Christi Heart Project                                                             | One year                   | Inactive vs. Active group were more likely to be more physically active one year postoperatively.                                                                                                                                           |
| Martini, 2010 <sup>15</sup>   | Elective CABG patients (Active: $60 \pm 10$ , Inactive: $62 \pm 10$ years old); 34% female                                | Brazil      | 185                       | Baecke Usual Physical Activity Questionnaire                                                 | Two years                  | Inactive vs. Active group did not have significantly different MACCE outcomes at two years.                                                                                                                                                 |

**Running Head:** PA and post-cardiac surgical outcomes

28

|                                              |                                   |                                                                                                                      |                             |      |                                                    |                                |                                                                                                                                                                           |
|----------------------------------------------|-----------------------------------|----------------------------------------------------------------------------------------------------------------------|-----------------------------|------|----------------------------------------------------|--------------------------------|---------------------------------------------------------------------------------------------------------------------------------------------------------------------------|
| 1<br>2<br>3<br>4<br>5<br>6<br>7<br>8         | Nery,<br>2010 <sup>16</sup>       | Elective CABG patients (Active:<br>60 ± 10, Inactive: 62 ± 10 years<br>old); 34% female                              | Brazil                      | 202  | Baecke Usual<br>Physical Activity<br>Questionnaire | Hospital<br>discharge          | Inactive vs. Active group had<br>more postoperative events<br>within 30 days and a longer<br>HLOS.                                                                        |
| 9<br>10<br>11<br>12<br>13                    | Rengo,<br>2010 <sup>17</sup>      | Acute or elective CABG patients ≥<br>70 years (Active: 72.3 ± 3.2,<br>Inactive: 76.1 ± 3.9 years old); 34%<br>female | Italy                       | 587  | Physical Activity<br>Scale for the<br>Elderly      | Mean 44.3 ±<br>21.0 months     | Physical activity had an<br>independent and dose<br>association with cardiac and all-<br>cause mortality five years<br>postoperatively.                                   |
| 14<br>15<br>16<br>17<br>18<br>19<br>20<br>21 | Cacciatore,<br>2012 <sup>19</sup> | All patients ≥ 65 years undergoing<br>CABG and/or valve procedures<br>(72.9 ± 4.8 years old); 48% female             | Italy                       | 250  | Physical Activity<br>Scale for the<br>Elderly      | Hospital<br>discharge          | Physical activity was<br>independently associated with<br>reduced prolonged ICU LOS.<br>Physical activity was not<br>independently associated with<br>postoperative ADLs. |
| 22<br>23<br>24<br>25<br>26<br>27             | Noyez,<br>2013 <sup>20</sup>      | Elective CABG and/or valve<br>patients (69.7 ± 10.1 years old);                                                      | Netherlands                 | 3150 | The Corpus<br>Christi Heart<br>Project             | 30 days<br>postoperative<br>ly | Physical activity was not<br>independently associated with<br>hospital or 30 day mortality.<br>Inactive vs. Active group had a<br>significantly longer ICU LOS.           |
| 28<br>29<br>30<br>31<br>32<br>33             | Min, 2015 <sup>21</sup>           | Elective CABG and/or valve<br>patients ≥ 65 years (74.7 ± 5.9<br>years old)                                          | United States<br>of America | 62   | The Health and<br>Retirement<br>Survey             | 4-6 months                     | Inactive vs. Active group had<br>significantly higher<br>postoperative physical activity<br>up to 6 months postoperatively.                                               |
| 34<br>35<br>36<br>37                         | van Laar <sup>22</sup>            | Patients ≥75 years undergoing<br>elective isolated aortic valve<br>replacement (79.5 ± 2.8 years old);<br>59% female | Netherlands                 | 115  | The Corpus<br>Christi Heart<br>Project             | 2 years<br>postoperative<br>ly | Inactive vs. Active group had<br>significantly higher mortality<br>rates 2 years postoperatively.                                                                         |

CABG, coronary artery bypass graft surgery; HLOS, hospital length of stay; ICU LOS, intensive care unit length of stay; MI, myocardial infarction; MACCE, major adverse cerebrovascular and cardiac events; ADL, activities of daily living.

Table 2. Major adverse and cerebrovascular events and postoperative events within 30 days

| Reference                                               | Outcome definition                                                                                                       | Adjustment variables                                               | Number of events per group                                                                                                                                                                                                                               | OR or HR and 95% CI                                                                                                                                                                            |
|---------------------------------------------------------|--------------------------------------------------------------------------------------------------------------------------|--------------------------------------------------------------------|----------------------------------------------------------------------------------------------------------------------------------------------------------------------------------------------------------------------------------------------------------|------------------------------------------------------------------------------------------------------------------------------------------------------------------------------------------------|
| <b>Major adverse cerebrovascular and cardiac events</b> |                                                                                                                          |                                                                    |                                                                                                                                                                                                                                                          |                                                                                                                                                                                                |
| Nery, 2007 <sup>13</sup>                                | One year postoperative AF, hospital readmission, new CABG, PCI, MI                                                       | None                                                               | Active: 8/25 (31%); Inactive: 17/30 (57%) <sup>a</sup>                                                                                                                                                                                                   | NR                                                                                                                                                                                             |
| Martini, 2010 <sup>15</sup>                             | Two year postoperative death, re-hospitalization, cerebrovascular accident, MI                                           | None                                                               | Active: 9/66 (14%); Inactive: 31/119 (26%)                                                                                                                                                                                                               | NR                                                                                                                                                                                             |
| Rengo, 2010 <sup>17</sup>                               | Five-year postoperative cardiac and all-cause mortality                                                                  | Demographics, medical history, medications, and clinical findings. | NR                                                                                                                                                                                                                                                       | <u>Adjusted proportional hazard models:</u><br><i>All-cause mortality:</i> Exp(B) 0.248 (95% CI 0.141-0.434) <sup>a</sup><br><i>Cardiac mortality:</i> Exp(B) 0.272 (0.133-0.555) <sup>a</sup> |
| van Laar 2015 <sup>22</sup>                             | Two-year mortality                                                                                                       | None                                                               | Active: 5/65 (13%); Inactive: 11/50 (22%) <sup>a</sup>                                                                                                                                                                                                   | NR                                                                                                                                                                                             |
| <b>Postoperative events within 30 days</b>              |                                                                                                                          |                                                                    |                                                                                                                                                                                                                                                          |                                                                                                                                                                                                |
| Markou, 2007 <sup>12</sup>                              | Perioperative MI, Re-intervention, postoperative complications (wound, renal, neurological, pulmonary, gastrointestinal) | None                                                               | <u>MI:</u> Active: 4/226 (2%); Inactive: 11/202 (5%) <sup>a</sup><br><u>Reoperation:</u> Active: 15/226 (7%); Inactive: 9/202 (5%),<br><u>Wound infection:</u> Active: 3/226 (1%); Inactive: 7/202 (3%),<br><u>Renal:</u> Active: 3/226; Inactive: 7/202 | NR                                                                                                                                                                                             |
| Nery, 2010 <sup>16</sup>                                | Mortality, MI, reoperation                                                                                               | Age, smoking, PVD, COPD, Cleveland Risk Score.                     | <u>Mortality:</u> Active: 0/66 (0%); Inactive: 7/136 (5%)<br><u>MI:</u> Active: 1/66 (2%); Inactive: 6/136 (4%)<br><u>Reoperation:</u> Active: 0/66 (0%); Inactive: 1/136 (0.5%)                                                                         | <u>Multivariate OR for being active:</u> 0.22 (95% CI 0.09-0.51, p=0.001)                                                                                                                      |

## Running Head: PA and post-cardiac surgical outcomes

30

|    |                               |                                                                                                  |                                                                                                                                                                            |                                                                                                                                                                                                                                                                                                                                                                                                                                                                                                                                                                                                                |                                                                                                                                                                                           |
|----|-------------------------------|--------------------------------------------------------------------------------------------------|----------------------------------------------------------------------------------------------------------------------------------------------------------------------------|----------------------------------------------------------------------------------------------------------------------------------------------------------------------------------------------------------------------------------------------------------------------------------------------------------------------------------------------------------------------------------------------------------------------------------------------------------------------------------------------------------------------------------------------------------------------------------------------------------------|-------------------------------------------------------------------------------------------------------------------------------------------------------------------------------------------|
| 1  |                               |                                                                                                  |                                                                                                                                                                            |                                                                                                                                                                                                                                                                                                                                                                                                                                                                                                                                                                                                                |                                                                                                                                                                                           |
| 2  |                               |                                                                                                  |                                                                                                                                                                            |                                                                                                                                                                                                                                                                                                                                                                                                                                                                                                                                                                                                                |                                                                                                                                                                                           |
| 3  |                               |                                                                                                  |                                                                                                                                                                            |                                                                                                                                                                                                                                                                                                                                                                                                                                                                                                                                                                                                                |                                                                                                                                                                                           |
| 4  | Rengo, 2010 <sup>17</sup>     | Low-output syndromes, MI, cardiac support, stroke, bleedings, mediastinitis, pneumonia, dialysis | None                                                                                                                                                                       | <u>Any surgical complication:</u><br>Active: 53/267 (19.7%); Inactive: 60/320 (18.6%)                                                                                                                                                                                                                                                                                                                                                                                                                                                                                                                          | NR                                                                                                                                                                                        |
| 5  |                               |                                                                                                  |                                                                                                                                                                            |                                                                                                                                                                                                                                                                                                                                                                                                                                                                                                                                                                                                                |                                                                                                                                                                                           |
| 6  |                               |                                                                                                  |                                                                                                                                                                            |                                                                                                                                                                                                                                                                                                                                                                                                                                                                                                                                                                                                                |                                                                                                                                                                                           |
| 7  |                               |                                                                                                  |                                                                                                                                                                            |                                                                                                                                                                                                                                                                                                                                                                                                                                                                                                                                                                                                                |                                                                                                                                                                                           |
| 8  |                               |                                                                                                  |                                                                                                                                                                            |                                                                                                                                                                                                                                                                                                                                                                                                                                                                                                                                                                                                                |                                                                                                                                                                                           |
| 9  |                               |                                                                                                  |                                                                                                                                                                            |                                                                                                                                                                                                                                                                                                                                                                                                                                                                                                                                                                                                                |                                                                                                                                                                                           |
| 10 | Giaccardi, 2011 <sup>18</sup> | Atrial fibrillation                                                                              | Age, episodes of AF one year preop, episodes of AF in the first week, $\beta$ -blockers, amiodarone, left ventricular volume, left atrial emptying fraction                | <u>Postoperative atrial fibrillation:</u> Active: 6/74 (8.1%); Inactive: 27/84 (32.1%) <sup>a</sup>                                                                                                                                                                                                                                                                                                                                                                                                                                                                                                            | <u>Multivariate OR for being inactive:</u> 4.04 (95% CI 1.16-14.14, p=0.029)                                                                                                              |
| 11 |                               |                                                                                                  |                                                                                                                                                                            |                                                                                                                                                                                                                                                                                                                                                                                                                                                                                                                                                                                                                |                                                                                                                                                                                           |
| 12 |                               |                                                                                                  |                                                                                                                                                                            |                                                                                                                                                                                                                                                                                                                                                                                                                                                                                                                                                                                                                |                                                                                                                                                                                           |
| 13 |                               |                                                                                                  |                                                                                                                                                                            |                                                                                                                                                                                                                                                                                                                                                                                                                                                                                                                                                                                                                |                                                                                                                                                                                           |
| 14 |                               |                                                                                                  |                                                                                                                                                                            |                                                                                                                                                                                                                                                                                                                                                                                                                                                                                                                                                                                                                |                                                                                                                                                                                           |
| 15 |                               |                                                                                                  |                                                                                                                                                                            |                                                                                                                                                                                                                                                                                                                                                                                                                                                                                                                                                                                                                |                                                                                                                                                                                           |
| 16 |                               |                                                                                                  |                                                                                                                                                                            |                                                                                                                                                                                                                                                                                                                                                                                                                                                                                                                                                                                                                |                                                                                                                                                                                           |
| 17 |                               |                                                                                                  |                                                                                                                                                                            |                                                                                                                                                                                                                                                                                                                                                                                                                                                                                                                                                                                                                |                                                                                                                                                                                           |
| 18 |                               |                                                                                                  |                                                                                                                                                                            |                                                                                                                                                                                                                                                                                                                                                                                                                                                                                                                                                                                                                |                                                                                                                                                                                           |
| 19 |                               |                                                                                                  |                                                                                                                                                                            |                                                                                                                                                                                                                                                                                                                                                                                                                                                                                                                                                                                                                |                                                                                                                                                                                           |
| 20 |                               |                                                                                                  |                                                                                                                                                                            |                                                                                                                                                                                                                                                                                                                                                                                                                                                                                                                                                                                                                |                                                                                                                                                                                           |
| 21 | Noyez, 2013 <sup>20</sup>     | Mortality, reoperation, stroke, renal insufficiency, sternal wound, ventilation                  | $\geq 75$ years, valve surgery, female, high operative risk, renal disease, obesity, NYHA IV, Insulin, vascular pathology, poor LVEF, lung disease, MI, neurological event | <u>Hospital mortality:</u> Active: 7/1815 (0.4%); Inactive: 15/1335 (1.1%) <sup>a</sup><br><u>30 day mortality:</u> Active: 10/1815 (0.6%); Inactive: 20/1335 (1.5%) <sup>a</sup><br><u>Reoperation:</u> Active: 105/1815 (5.8%); Inactive: 68/1335 (5%)<br><u>Stroke:</u> Active: 9/1815 (0.5%); Inactive: 12/1335 (0.9%)<br><u>Renal insufficiency:</u> Active: 32/1815 (1.8%); Inactive: 39/1335 (2.9%) <sup>a</sup><br><u>Sternal wound:</u> Active: 10/1815 (0.6%); Inactive: 17/1335 (1.3%) <sup>a</sup><br><u>Ventilation &gt;2 days:</u> Active: 31/1815 (1.7%); Inactive: 54/1335 (4.0%) <sup>a</sup> | <u>Hospital mortality multivariate OR for being inactive:</u> 1.20 (95% CI 0.4-3.5, p=0.617)<br><u>30 day mortality multivariate OR for being inactive:</u> 1.10 (95% CI 0.5-2.7, p=0.70) |
| 22 |                               |                                                                                                  |                                                                                                                                                                            |                                                                                                                                                                                                                                                                                                                                                                                                                                                                                                                                                                                                                |                                                                                                                                                                                           |
| 23 |                               |                                                                                                  |                                                                                                                                                                            |                                                                                                                                                                                                                                                                                                                                                                                                                                                                                                                                                                                                                |                                                                                                                                                                                           |
| 24 |                               |                                                                                                  |                                                                                                                                                                            |                                                                                                                                                                                                                                                                                                                                                                                                                                                                                                                                                                                                                |                                                                                                                                                                                           |
| 25 |                               |                                                                                                  |                                                                                                                                                                            |                                                                                                                                                                                                                                                                                                                                                                                                                                                                                                                                                                                                                |                                                                                                                                                                                           |
| 26 |                               |                                                                                                  |                                                                                                                                                                            |                                                                                                                                                                                                                                                                                                                                                                                                                                                                                                                                                                                                                |                                                                                                                                                                                           |
| 27 |                               |                                                                                                  |                                                                                                                                                                            |                                                                                                                                                                                                                                                                                                                                                                                                                                                                                                                                                                                                                |                                                                                                                                                                                           |
| 28 |                               |                                                                                                  |                                                                                                                                                                            |                                                                                                                                                                                                                                                                                                                                                                                                                                                                                                                                                                                                                |                                                                                                                                                                                           |
| 29 |                               |                                                                                                  |                                                                                                                                                                            |                                                                                                                                                                                                                                                                                                                                                                                                                                                                                                                                                                                                                |                                                                                                                                                                                           |
| 30 |                               |                                                                                                  |                                                                                                                                                                            |                                                                                                                                                                                                                                                                                                                                                                                                                                                                                                                                                                                                                |                                                                                                                                                                                           |
| 31 |                               |                                                                                                  |                                                                                                                                                                            |                                                                                                                                                                                                                                                                                                                                                                                                                                                                                                                                                                                                                |                                                                                                                                                                                           |
| 32 |                               |                                                                                                  |                                                                                                                                                                            |                                                                                                                                                                                                                                                                                                                                                                                                                                                                                                                                                                                                                |                                                                                                                                                                                           |
| 33 |                               |                                                                                                  |                                                                                                                                                                            |                                                                                                                                                                                                                                                                                                                                                                                                                                                                                                                                                                                                                |                                                                                                                                                                                           |
| 34 |                               |                                                                                                  |                                                                                                                                                                            |                                                                                                                                                                                                                                                                                                                                                                                                                                                                                                                                                                                                                |                                                                                                                                                                                           |
| 35 |                               |                                                                                                  |                                                                                                                                                                            |                                                                                                                                                                                                                                                                                                                                                                                                                                                                                                                                                                                                                |                                                                                                                                                                                           |

<sup>a</sup> indicates statistical significance (P<0.05). CABG, coronary artery bypass graft; PCI, percutaneous coronary intervention; MI, myocardial infarction; NR, not reported; PVD, peripheral vascular disease; COPD, chronic obstructive pulmonary disease; OR, odds ratio; AF, atrial fibrillation; BMI, body mass index; NYHA, New York Heart Association; LVEF, left ventricular ejection fraction.

Running Head: PA and post-cardiac surgical outcomes

31

**Table 3.** Hospital length of stay, ICU length of stay, and postoperative activities of daily living and physical activity.

| First author, year             | Adjustment variables                                                                          | Length of stay/number of events per group                                                               | Odds ratio (OR) or hazard ratio (HR) and 95% confidence interval (CI)                                                                                          |
|--------------------------------|-----------------------------------------------------------------------------------------------|---------------------------------------------------------------------------------------------------------|----------------------------------------------------------------------------------------------------------------------------------------------------------------|
| <b>Hospital length of stay</b> |                                                                                               |                                                                                                         |                                                                                                                                                                |
| Markou, 2007 <sup>12</sup>     | None                                                                                          | Active: 6.9 ± 8.2 days; Inactive: 7.3 ± 7.1 days                                                        | NR                                                                                                                                                             |
| Nery, 2007 <sup>13</sup>       | None                                                                                          | Active: 12 ± 5 days, median 9 days (IQR 8-15); Inactive: 15 ± 8 days, median 12 (IQR 9-19) <sup>a</sup> | NR                                                                                                                                                             |
| Nery, 2010 <sup>16</sup>       | Age, sex, Cleveland Risk Score, smoking, systemic arterial hypertension, stroke, MI, and PVD. | NR                                                                                                      | HR: 0.67 (95% CI 0.49-0.93) <sup>a</sup>                                                                                                                       |
| <b>ICU length of stay</b>      |                                                                                               |                                                                                                         |                                                                                                                                                                |
| Markou, 2007 <sup>12</sup>     | None                                                                                          | Active: 2.2 ± 5.3 days; Inactive: 2.1 ± 3.5 days                                                        | NR                                                                                                                                                             |
| Cacciatore, 2012 <sup>19</sup> | For ICU LOS >3 days: age, off-pump CABG, stroke, renal failure.                               | Active: 2.58 ± 1.09 days; Inactive: 3.33 ± 1.68 days <sup>a,b</sup>                                     | <u>For ICU length of stay &gt;3 days</u><br>Univariate OR: 0.984 (95% CI 0.977-0.992) <sup>a</sup><br>Multivariate OR: 0.992 (95% CI 0.983-1.000) <sup>a</sup> |
| Noyez, 2013 <sup>20</sup>      | None                                                                                          | Active: 1.3 ± 1.9 days; Inactive 3.0 ± 41.8 days <sup>a</sup>                                           | NR                                                                                                                                                             |
|                                |                                                                                               | ICU > 5 days: Active: 19/1815 (1.0%); Inactive: 46/1335 (3.4%) <sup>a</sup>                             |                                                                                                                                                                |
| <b>Postoperative ADLs</b>      |                                                                                               |                                                                                                         |                                                                                                                                                                |
| Cacciatore,                    | Age, gender, CABG, NYHA ≥3,                                                                   | NR                                                                                                      | Beta: 0.099                                                                                                                                                    |

**Running Head:** PA and post-cardiac surgical outcomes

32

2012<sup>19</sup> ICU LOS  $\geq$ 3 days, Off-pump CABG, diabetes, renal failure, stroke, PVD, COPD, Cumulative Illness Rating Scale.

### Postoperative Physical activity

Markou, 2007<sup>12</sup> Age  $\geq$ 75 years, gender, neurological disease, vascular disease, diabetes, and preoperative physical activity.

Better PA post-operatively: Active: 48/226 (21.2 %), Inactive: 129/202 (64%)<sup>a</sup>

Equal PA post-operatively: Active: 112/226 (49.6%), Inactive: 59/202 (29.2%)<sup>a</sup>

Worse PA postoperatively: Active: 66/226 (29.2%), Inactive: 14/202 (6.9%)<sup>a</sup>

Decreased postoperative PA OR (inactive group as reference): 8.1 (95% CI 3.5-13.5)<sup>a</sup>

Markou, 2008<sup>14</sup> Diabetes, vascular disease, neurological disease, renal disease, MI, preoperative activity level.

NR

For becoming physically inactive postoperatively

Male OR (inactive group as reference): 7.11 (95% CI 3.6-13.9)<sup>a</sup>

Female OR (inactive group as reference): 11.0 (95% CI 2.2-55)<sup>a</sup>

Min, 2015<sup>21</sup> None

NR

Each weekly preoperative activity point was associated with a loss of 0.78 points at 6 weeks,  $p < 0.001$ , and 0.65 points at 6 months)<sup>a</sup>

<sup>a</sup> indicates statistical significance ( $P < 0.05$ ). <sup>b</sup>Unpublished data obtained from Cacciatore et al, [19]. ICU, Intensive Care Unit; ADL; activities of daily living; IQR, interquartile range; NR, not reported; MI, myocardial infarction; PVD, peripheral vascular disease; HR, hazard ratio; OR, odds ratio; CABG, coronary artery bypass graft; NYHA, New York Heart Association; COPD, chronic obstructive pulmonary disease; PA, physical activity.

**Running Head:** PA and post-cardiac surgical outcomes

**Table 4.** Newcastle-Ottawa scale risk of bias scores

| Reference                      | Selection       | Comparability   | Outcome         | Total           |
|--------------------------------|-----------------|-----------------|-----------------|-----------------|
| Markou, 2007 <sup>12</sup>     | 3               | 2               | 3               | 8               |
| Nery, 2007 <sup>13</sup>       | 3               | 0               | 2               | 5               |
| Markou, 2008 <sup>14</sup>     | 3               | 2               | 2               | 7               |
| Martini, 2010 <sup>15</sup>    | 3               | 0               | 2               | 5               |
| Nery, 2010 <sup>16</sup>       | 3               | 2               | 2               | 7               |
| Rengo, 2010 <sup>17</sup>      | 4               | 2               | 3               | 9               |
| Giaccardi, 2011 <sup>18</sup>  | 3               | 2               | 2               | 7               |
| Cacciatore, 2012 <sup>19</sup> | 3               | 2               | 2               | 7               |
| Noyez, 2013 <sup>20</sup>      | 3               | 2               | 3               | 8               |
| Min, 2015 <sup>21</sup>        | 4               | 2               | 1               | 7               |
| van Laar <sup>22</sup>         | 3               | 0               | 3               | 6               |
| Average scores $\pm$ SD        | 3.18 $\pm$ 0.40 | 1.45 $\pm$ 0.93 | 2.27 $\pm$ 0.65 | 6.91 $\pm$ 1.22 |

Maximum scores are 4, 2, and 3 for selection, comparability, and outcome, respectively.  
Maximum total score is 9. A lower score within each category and for a total score indicates a higher risk of bias.

**Box 1.** Guidelines for physical activity measurement and outcome assessment in cardiac surgery patients: limitations and opportunities for future research

| Drawbacks                                                                        | Opportunity                                                                                                                                                                                                                                                                                                                                                                                                                                  |
|----------------------------------------------------------------------------------|----------------------------------------------------------------------------------------------------------------------------------------------------------------------------------------------------------------------------------------------------------------------------------------------------------------------------------------------------------------------------------------------------------------------------------------------|
| <b>Physical activity</b>                                                         |                                                                                                                                                                                                                                                                                                                                                                                                                                              |
| 1. Heterogeneity in tools used across studies                                    | -use of objectively measured tools (e.g., pedometers, accelerometers) accompanied by a questionnaire which can produce data that can be compared across studies, such as step counts, intensity, and duration of physical activity.                                                                                                                                                                                                          |
| 2. Only subjective measures were used                                            | -Capture physical activity behavior as soon as a patient is placed on a wait list, or in non-elective cases, as soon as possible prior to surgery.                                                                                                                                                                                                                                                                                           |
| 3. Time of preoperative physical activity assessment was unclear in most studies | -Physical activity should be assessed ideally over a 7 day period.                                                                                                                                                                                                                                                                                                                                                                           |
|                                                                                  | -Physical activity should be assessed by intensity and duration per week, and in steps per day.                                                                                                                                                                                                                                                                                                                                              |
| <b>Outcomes</b>                                                                  |                                                                                                                                                                                                                                                                                                                                                                                                                                              |
| 4. Heterogeneity in MACCE and postoperative events within 30 days definitions    | -MACCE should be evaluated as a long-term outcome and defined as death, stroke, myocardial infarction, and the need for re-do cardiac surgery. Each outcome should be evaluated individually.                                                                                                                                                                                                                                                |
|                                                                                  | -30-day postoperative events should be evaluated using the STS checklist: <sup>10</sup> along with reasons, evaluate unexpected return to the operating room, complications due to pulmonary, cardiovascular, gastrointestinal, hematological, urologic, infection, neurological, and other important miscellaneous outcomes (e.g., unexpected admission to ICU, or other events requiring admission to operating room requiring anesthesia. |
|                                                                                  | -re-hospitalization for any cause after cardiac surgery should also be added to outcomes.                                                                                                                                                                                                                                                                                                                                                    |
| 5. No patient-oriented outcomes were assessed                                    | -Capture postoperative health-related quality of life, mental health, pain, and cardiac symptoms using validated tools within the first 30 days and at least one-year postoperatively.                                                                                                                                                                                                                                                       |
| <b>Statistical procedures</b>                                                    |                                                                                                                                                                                                                                                                                                                                                                                                                                              |
| 6. Shortage of studies addressing confounders                                    | -use multivariate analysis, including logistic or linear regression, or analysis of variance statistical procedures. Ensure that a power analysis is conducted prior to conducting the study.                                                                                                                                                                                                                                                |

MACCE, major adverse cerebrovascular and cardiac events. STS, Society of Thoracic Surgeons. ICU, intensive care unit.



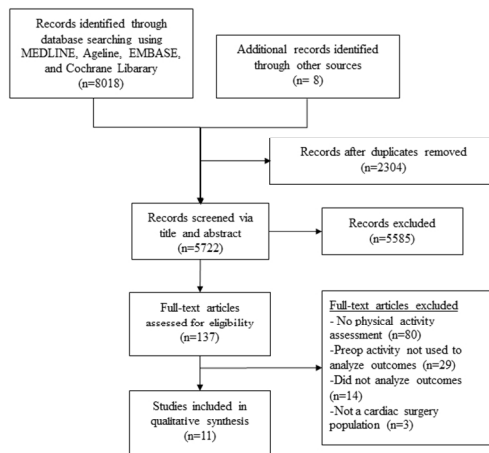

Figure 1. Study flow diagram

108x60mm (300 x 300 DPI)

**MEDLINE search strategy.**

1. Sedentary Lifestyle/
2. physical endurance/ or physical fitness/
3. exercis\*.mp. [mp=title, abstract, original title, name of substance word, subject heading word, keyword heading word, protocol supplementary concept word, rare disease supplementary concept word, unique identifier]
4. motor activit\*.mp. [mp=title, abstract, original title, name of substance word, subject heading word, keyword heading word, protocol supplementary concept word, rare disease supplementary concept word, unique identifier]
5. accelerometry.mp. [mp=title, abstract, original title, name of substance word, subject heading word, keyword heading word, protocol supplementary concept word, rare disease supplementary concept word, unique identifier]
6. sedentary.mp. [mp=title, abstract, original title, name of substance word, subject heading word, keyword heading word, protocol supplementary concept word, rare disease supplementary concept word, unique identifier]
7. inactive.mp. [mp=title, abstract, original title, name of substance word, subject heading word, keyword heading word, protocol supplementary concept word, rare disease supplementary concept word, unique identifier]
8. (inactivity or physical inactivity or physical activity or active lifestyle or inactive lifestyle or physically active or physically inactive).mp. [mp=title, abstract, original title, name of substance word, subject heading word, keyword heading word, protocol supplementary concept word, rare disease supplementary concept word, unique identifier]
9. physical therapy modalities/ or exp exercise therapy/ or physiotherapy.mp. or physical therapy.mp. or motor activity/ or exp Exercise/ or physical exertion/ or physical endurance/ or anaerobic threshold/ or exercise tolerance/ or physical fitness/
10. (physical adj5 function\*).mp. [mp=title, abstract, original title, name of substance word, subject heading word, keyword heading word, protocol supplementary concept word, rare disease supplementary concept word, unique identifier]
11. physical\* mobil\*.mp.
12. \*"Quality of Life"/
13. 1 or 2 or 3 or 4 or 5 or 6 or 7 or 8 or 9 or 10 or 11 or 12
14. cardiac surger\*.mp. [mp=title, abstract, original title, name of substance word, subject heading word, keyword heading word, protocol supplementary concept word, rare disease supplementary concept word, unique identifier]
15. cardiovascular surger\*.mp. [mp=title, abstract, original title, name of substance word, subject heading word, keyword heading word, protocol supplementary concept word, rare disease supplementary concept word, unique identifier]
16. coronary artery bypass.mp. [mp=title, abstract, original title, name of substance word, subject heading word, keyword heading word, protocol supplementary concept word, rare disease supplementary concept word, unique identifier]
17. heart bypass.mp. [mp=title, abstract, original title, name of substance word, subject heading word, keyword heading word, protocol supplementary concept word, rare disease supplementary concept word, unique identifier]

- 1
- 2
- 3
- 4 18. ((aortic or aorta or mitral) adj7 (replacement or repair)).mp. [mp=title, abstract, original title,
- 5 name of substance word, subject heading word, keyword heading word, protocol supplementary
- 6 concept word, rare disease supplementary concept word, unique identifier]
- 7 19. cardiovascular surgical procedures/ or cardiac surgical procedures/ or cardiac valve
- 8 annuloplasty/ or heart bypass, right/ or exp heart valve prosthesis implantation/ or myocardial
- 9 revascularization/ or coronary artery bypass/ or coronary artery bypass, off-pump/ or vascular
- 10 surgical procedures/
- 11 20. 14 or 15 or 16 or 17 or 18 or 19
- 12 21. (postoperative\* or postoperative period or post surgical or post surgery).mp. or Postoperative
- 13 Period/ or exp Postoperative Complications/
- 14 22. perioperative\*.mp. or Perioperative Period/ or peroperative\*.mp.
- 15 23. preoperative\*.mp. or Preoperative Period/
- 16 24. Time Factors/
- 17 25. (after adj7 (surgery or bypass)).mp. [mp=title, abstract, original title, name of substance
- 18 word, subject heading word, keyword heading word, protocol supplementary concept word, rare
- 19 disease supplementary concept word, unique identifier]
- 20 26. (inpatient\* or in hospital or hospitali\* or discharge\*).mp. [mp=title, abstract, original title,
- 21 name of substance word, subject heading word, keyword heading word, protocol supplementary
- 22 concept word, rare disease supplementary concept word, unique identifier]
- 23 27. 21 or 22 or 23 or 24 or 25 or 26
- 24 28. (pediatric\* or paediatric\* or child\* or adolescen\* or youth).mp. [mp=title, abstract, original
- 25 title, name of substance word, subject heading word, keyword heading word, protocol
- 26 supplementary concept word, rare disease supplementary concept word, unique identifier]
- 27 29. 13 and 20 and 27
- 28 30. 29 not 28
- 29
- 30
- 31
- 32
- 33
- 34
- 35
- 36
- 37
- 38
- 39
- 40
- 41
- 42
- 43
- 44
- 45
- 46
- 47
- 48
- 49
- 50
- 51
- 52
- 53
- 54
- 55
- 56
- 57
- 58
- 59
- 60

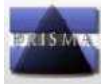

# PRISMA 2009 Checklist

| Section/topic                      | #  | Checklist item                                                                                                                                                                                                                                                                                              | Reported on page # |
|------------------------------------|----|-------------------------------------------------------------------------------------------------------------------------------------------------------------------------------------------------------------------------------------------------------------------------------------------------------------|--------------------|
| <b>TITLE</b>                       |    |                                                                                                                                                                                                                                                                                                             |                    |
| Title                              | 1  | Identify the report as a systematic review, meta-analysis, or both.                                                                                                                                                                                                                                         | 1                  |
| <b>ABSTRACT</b>                    |    |                                                                                                                                                                                                                                                                                                             |                    |
| Structured summary                 | 2  | Provide a structured summary including, as applicable: background; objectives; data sources; study eligibility criteria, participants, and interventions; study appraisal and synthesis methods; results; limitations; conclusions and implications of key findings; systematic review registration number. | 4                  |
| <b>INTRODUCTION</b>                |    |                                                                                                                                                                                                                                                                                                             |                    |
| Rationale                          | 3  | Describe the rationale for the review in the context of what is already known.                                                                                                                                                                                                                              | 6                  |
| Objectives                         | 4  | Provide an explicit statement of questions being addressed with reference to participants, interventions, comparisons, outcomes, and study design (PICOS).                                                                                                                                                  | 6-7                |
| <b>METHODS</b>                     |    |                                                                                                                                                                                                                                                                                                             |                    |
| Protocol and registration          | 5  | Indicate if a review protocol exists, if and where it can be accessed (e.g., Web address), and, if available, provide registration information including registration number.                                                                                                                               | 8                  |
| Eligibility criteria               | 6  | Specify study characteristics (e.g., PICOS, length of follow-up) and report characteristics (e.g., years considered, language, publication status) used as criteria for eligibility, giving rationale.                                                                                                      | 8                  |
| Information sources                | 7  | Describe all information sources (e.g., databases with dates of coverage, contact with study authors to identify additional studies) in the search and date last searched.                                                                                                                                  | 9                  |
| Search                             | 8  | Present full electronic search strategy for at least one database, including any limits used, such that it could be repeated.                                                                                                                                                                               | 9                  |
| Study selection                    | 9  | State the process for selecting studies (i.e., screening, eligibility, included in systematic review, and, if applicable, included in the meta-analysis).                                                                                                                                                   | 8-9                |
| Data collection process            | 10 | Describe method of data extraction from reports (e.g., piloted forms, independently, in duplicate) and any processes for obtaining and confirming data from investigators.                                                                                                                                  | 10                 |
| Data items                         | 11 | List and define all variables for which data were sought (e.g., PICOS, funding sources) and any assumptions and simplifications made.                                                                                                                                                                       | 8                  |
| Risk of bias in individual studies | 12 | Describe methods used for assessing risk of bias of individual studies (including specification of whether this was done at the study or outcome level), and how this information is to be used in any data synthesis.                                                                                      | 10                 |
| Summary measures                   | 13 | State the principal summary measures (e.g., risk ratio, difference in means).                                                                                                                                                                                                                               | No meta-analysis   |

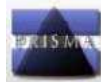

# PRISMA 2009 Checklist

Page 1 of 2

| Synthesis of results          | 14 | Describe the methods of handling data and combining results of studies, if done, including measures of consistency (e.g., $I^2$ ) for each meta-analysis.                                                | No meta-analysis                         |
|-------------------------------|----|----------------------------------------------------------------------------------------------------------------------------------------------------------------------------------------------------------|------------------------------------------|
| Page 1 of 2                   |    |                                                                                                                                                                                                          |                                          |
| Section/topic                 | #  | Checklist item                                                                                                                                                                                           | Reported on page #                       |
| Risk of bias across studies   | 15 | Specify any assessment of risk of bias that may affect the cumulative evidence (e.g., publication bias, selective reporting within studies).                                                             | N/A                                      |
| Additional analyses           | 16 | Describe methods of additional analyses (e.g., sensitivity or subgroup analyses, meta-regression), if done, indicating which were pre-specified.                                                         | N/A                                      |
| <b>RESULTS</b>                |    |                                                                                                                                                                                                          |                                          |
| Study selection               | 17 | Give numbers of studies screened, assessed for eligibility, and included in the review, with reasons for exclusions at each stage, ideally with a flow diagram.                                          | 11                                       |
| Study characteristics         | 18 | For each study, present characteristics for which data were extracted (e.g., study size, PICOS, follow-up period) and provide the citations.                                                             | 11 and in Table 1 (page 27-28)           |
| Risk of bias within studies   | 19 | Present data on risk of bias of each study and, if available, any outcome level assessment (see item 12).                                                                                                | 15 and in Table 4 (page 33)              |
| Results of individual studies | 20 | For all outcomes considered (benefits or harms), present, for each study: (a) simple summary data for each intervention group (b) effect estimates and confidence intervals, ideally with a forest plot. | 8-10 and in tables 2 and 3 (pages 23-27) |
| Synthesis of results          | 21 | Present results of each meta-analysis done, including confidence intervals and measures of consistency.                                                                                                  | No meta-analysis                         |
| Risk of bias across studies   | 22 | Present results of any assessment of risk of bias across studies (see Item 15).                                                                                                                          | N/A                                      |
| Additional analysis           | 23 | Give results of additional analyses, if done (e.g., sensitivity or subgroup analyses, meta-regression [see Item 16]).                                                                                    | N/A                                      |
| <b>DISCUSSION</b>             |    |                                                                                                                                                                                                          |                                          |
| Summary of evidence           | 24 | Summarize the main findings including the strength of evidence for each main outcome; consider their relevance to key groups (e.g., healthcare providers, users, and policy makers).                     | 16-20                                    |

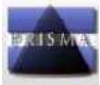

# PRISMA 2009 Checklist

1  
2  
3  
4  
5  
6  
7  
8  
9  
10  
11  
12  
13  
14  
15  
16  
17  
18  
19  
20  
21  
22  
23  
24  
25  
26  
27  
28  
29  
30  
31  
32  
33  
34  
35  
36  
37  
38  
39  
40  
41  
42  
43  
44  
45  
46  
47  
48  
49

|                |    |                                                                                                                                                               |       |
|----------------|----|---------------------------------------------------------------------------------------------------------------------------------------------------------------|-------|
| Limitations    | 25 | Discuss limitations at study and outcome level (e.g., risk of bias), and at review-level (e.g., incomplete retrieval of identified research, reporting bias). | 20    |
| Conclusions    | 26 | Provide a general interpretation of the results in the context of other evidence, and implications for future research.                                       | 20-21 |
| <b>FUNDING</b> |    |                                                                                                                                                               |       |
| Funding        | 27 | Describe sources of funding for the systematic review and other support (e.g., supply of data); role of funders for the systematic review.                    | 2-3   |

From: Moher D, Liberati A, Tetzlaff J, Altman DG, The PRISMA Group (2009). Preferred Reporting Items for Systematic Reviews and Meta-Analyses: The PRISMA Statement. PLoS Med 6(6): e1000097. doi:10.1371/journal.pmed1000097

For more information, visit: [www.prisma-statement.org](http://www.prisma-statement.org).

Page 2 of 2
