# Supplementary material for: Bangladesh Environmental Enteric Dysfunction (BEED) study: protocol for a community-based intervention study to validate non-invasive biomarkers of environmental enteric dysfunction
Source: PubMed Central journal article supplement (PMC5724211; doi:10.1136/bmjopen-2017-017768), 2017-08-11
Supplement: bmjopen-2017-017768supp001.pdf [file bmjopen-2017-017768supp001.pdf]

## SUPPLEMENTARY FILE 1

### Inclusion and exclusion criteria

| Inclusion criteria                                                                                                                                                                                                                                                                                                                                                                                                                                                                                   | Exclusion criteria                                                                                                                                                                                                                                                                                                                                                                                             |
|------------------------------------------------------------------------------------------------------------------------------------------------------------------------------------------------------------------------------------------------------------------------------------------------------------------------------------------------------------------------------------------------------------------------------------------------------------------------------------------------------|----------------------------------------------------------------------------------------------------------------------------------------------------------------------------------------------------------------------------------------------------------------------------------------------------------------------------------------------------------------------------------------------------------------|
| Child cohort                                                                                                                                                                                                                                                                                                                                                                                                                                                                                         |                                                                                                                                                                                                                                                                                                                                                                                                                |
| <ul style="list-style-type: none"><li>- Parent(s) willing to sign consent form</li><li>- Child age 12-18 months</li><li>- LAZ &lt; -2 (for stunted cohort) or</li><li>- LAZ between &lt; -1 to -2 (for 'at risk of stunting' cohort)</li><li>- Parent(s) willing to bring child to the study site for nutritional therapy</li><li>- Parents willing to have child undergo laboratory investigations and upper GI endoscopy and biopsy if the child fails to respond to nutritional therapy</li></ul> | <ul style="list-style-type: none"><li>- Severe acute malnutrition (SAM), severe anemia (&lt;8 g hemoglobin/dL), TB, other chronic diseases or any congenital disorder or deformity</li><li>- Diarrhoea: Ongoing episode of diarrhoea, history of persistent diarrhoea in the past month or history of acute diarrhoea in the past 7 days</li><li>- Known allergy to eggs or milk or milk intolerance</li></ul> |
| Adult cohort                                                                                                                                                                                                                                                                                                                                                                                                                                                                                         |                                                                                                                                                                                                                                                                                                                                                                                                                |
| <ul style="list-style-type: none"><li>- Willing to sign consent form</li><li>- Age 18-45 years</li><li>- BMI &lt; 18.5</li><li>- Willing to visit the study site every day for 2 months for nutritional therapy</li><li>- Willing to undergo endoscopy and biopsy if he/she fails to respond to nutritional therapy</li></ul>                                                                                                                                                                        | <ul style="list-style-type: none"><li>- Severe anemia (&lt;8 g/dl), TB and other chronic diseases</li><li>- Pregnant women, lactating women, drug abuse, known psychiatric disorders</li><li>- High clinical suspicion of cancer or other chronic or acute diseases</li><li>- Known allergy to any components of the nutrition intervention.</li></ul>                                                         |

## SUPPLEMENTARY FILE 2

### Biological samples aliquoting and preservation

| Sample | Amount  | Aliquots | Copy 1      | Copy 2                 | Copy 3                 | Copy 4           | Copy 5              | Copy 6           | Preserve |
|--------|---------|----------|-------------|------------------------|------------------------|------------------|---------------------|------------------|----------|
| Blood  | 5 mL    | 6        | Whole blood | 1 mL plasma Biomarkers | 1 mL plasma Biomarkers | 200 µL Plasma KT | 1 mL plasma Storage | Whole blood Cell | -80°C    |
| Feces  | 2 g     | 2        | Microbiota  | Microbiota             | -                      | -                | -                   | -                | -80°C    |
| Feces  | 15-20 g | 5        | Biomarker   | Biomarker              | TAC                    | Storage          | Storage             | -                | -80°C    |
| Urine  | 10 mL   | 3        | 1 mL LR     | 1 mL Storage           | 1 mL Storage           | -                | -                   | -                | -80°C    |

**SUPPLEMENTARY FILE 3**

**Anthropometric data and food collection tools**

| <b>Anthropometric scale</b>            |                                                                                                                                                                                               |                                                                                                                                                                                                                           |                            |                                                                                                                                                                                                                                                                                                |           |
|----------------------------------------|-----------------------------------------------------------------------------------------------------------------------------------------------------------------------------------------------|---------------------------------------------------------------------------------------------------------------------------------------------------------------------------------------------------------------------------|----------------------------|------------------------------------------------------------------------------------------------------------------------------------------------------------------------------------------------------------------------------------------------------------------------------------------------|-----------|
| Child cohort                           | Instrument                                                                                                                                                                                    | Precision                                                                                                                                                                                                                 | Adult cohort               | Instrument                                                                                                                                                                                                                                                                                     | Precision |
| Weight                                 | Seca digital weighing scale ( <a href="http://meenamedical.com/uploads/Manuals/Scale/seca_727_Brochure.pdf">http://meenamedical.com/uploads/Manuals/Scale/seca_727_Brochure.pdf</a> )         | 1 gm                                                                                                                                                                                                                      | Weight                     | Tanita step-on type weighing scale ( <a href="http://healthmonitor.xyz/B0052BPUCA-health-meter-digital-hd-661-wh-white-step-on-type-switch-to-turn-the-ride-tanita">http://healthmonitor.xyz/B0052BPUCA-health-meter-digital-hd-661-wh-white-step-on-type-switch-to-turn-the-ride-tanita</a> ) | 100gm     |
| Length                                 | Seca Infantometer ( <a href="http://www.seca.com/en_ae/products/all-products/product-details/seca416.html">http://www.seca.com/en_ae/products/all-products/product-details/seca416.html</a> ) | 0.1 cm                                                                                                                                                                                                                    | Height                     | Seca Stable stadiometer for mobile height measurement ( <a href="http://www.seca.com/en_ae/products/all-products/product-details/seca217.html">http://www.seca.com/en_ae/products/all-products/product-details/seca217.html</a> )                                                              | 0.1 cm    |
| Triceps skinfold thickness             | Harpندن Skin fold callipers ( <a href="http://www.harpندن-skinfold.com/">http://www.harpندن-skinfold.com/</a> )                                                                               | 99%                                                                                                                                                                                                                       | Triceps skinfold thickness | Harpندن Skin fold callipers ( <a href="http://www.harpندن-skinfold.com/">http://www.harpندن-skinfold.com/</a> )                                                                                                                                                                                | 99%       |
| Head Circumference                     | Measuring tape                                                                                                                                                                                |                                                                                                                                                                                                                           |                            |                                                                                                                                                                                                                                                                                                |           |
| Mid upper Arm Circumference            | MUAC tape                                                                                                                                                                                     |                                                                                                                                                                                                                           |                            |                                                                                                                                                                                                                                                                                                |           |
| <b>Measuring scale</b>                 |                                                                                                                                                                                               |                                                                                                                                                                                                                           |                            |                                                                                                                                                                                                                                                                                                |           |
| Name                                   |                                                                                                                                                                                               | Purpose                                                                                                                                                                                                                   |                            | Precision                                                                                                                                                                                                                                                                                      |           |
| Sartorius TE4101 digital scale         |                                                                                                                                                                                               | Measurement of egg<br><a href="http://scaleman.com/sartorius-talent-digital-te4101-compact-scale.html">http://scaleman.com/sartorius-talent-digital-te4101-compact-scale.html</a>                                         |                            | 0.1 g                                                                                                                                                                                                                                                                                          |           |
| KERN EMB 200-2 Precision balance       |                                                                                                                                                                                               | Sugar measurement<br><a href="https://www.kern-sohn.com/en/EMB">https://www.kern-sohn.com/en/EMB</a>                                                                                                                      |                            | 0.01g                                                                                                                                                                                                                                                                                          |           |
| PYREX™ VISTA™ Griffin Beakers (250 ml) |                                                                                                                                                                                               | For measuring milk during offering<br><a href="https://www.fishersci.com/shop/products/pyrex-vista-griffin-beakers-250ml/07250056">https://www.fishersci.com/shop/products/pyrex-vista-griffin-beakers-250ml/07250056</a> |                            |                                                                                                                                                                                                                                                                                                |           |

## SUPPLEMENTARY FILE 4

### Quality Controls

|                          |                                                                                                                                                                                                          |
|--------------------------|----------------------------------------------------------------------------------------------------------------------------------------------------------------------------------------------------------|
| Anthropometric data      | <ul style="list-style-type: none"><li>• All scales are calibrated daily</li><li>• 3 measurement are taken and the average value is recorded</li><li>• 10% data are collected by the supervisor</li></ul> |
| Food scales              | <ul style="list-style-type: none"><li>• All scales are calibrated daily</li><li>• Same cup is used for measurement</li></ul>                                                                             |
| Data entry               | <ul style="list-style-type: none"><li>• Double data entry system is used</li><li>• Interrater reliability (kappa) is a measured to examine the agreement</li></ul>                                       |
| Egg-Milk quality control | <ul style="list-style-type: none"><li>• Assessment of nutrition content- thrice in a year</li><li>• Assessment for salmonella/avian influenza - thrice in a year</li></ul>                               |
